**1 Comprehensive molecular characterization of *PRKCG* for glioma diagnosis,**  
**2 prognosis and treatment prediction**

3 Lin Liu<sup>1,2,3,4,7</sup>, Guangyu Wang<sup>1,2,3,4,5,7</sup>, Ligu Wang<sup>6</sup>, Chunlei Yu<sup>1,2,3,4</sup>, Mengwei Li<sup>1,2,3,4</sup>,  
 4 Shuhui Song<sup>1,2,3,4</sup>, Lili Hao<sup>1,2,3,4</sup>, Lina Ma<sup>1,2,3,4,\*</sup>, Zhang Zhang<sup>1,2,3,4,8,\*</sup>

5 <sup>1</sup> National Genomics Data Center, Beijing 100101, China

6 <sup>2</sup> BIG Data Center, Beijing Institute of Genomics, Chinese Academy of Sciences, Beijing  
 7 100101, China

8 <sup>3</sup> CAS Key Laboratory of Genome Sciences and Information, Beijing Institute of  
 9 Genomics, Chinese Academy of Sciences, Beijing 100101, China

10 <sup>4</sup> University of Chinese Academy of Sciences, Beijing 100101, China

11 <sup>5</sup> Present Address: The Methodist Hospital Research Institute, 6670 Bertner Ave,  
 12 Houston, Texas 77030, United States

13 <sup>6</sup> Division of Biomedical Statistics and Informatics, Mayo Clinic College of Medicine,  
 14 Rochester, MN 55905, United States

15 <sup>7</sup> These authors contributed equally.

16 <sup>8</sup> Lead Contact

17

18 \*Correspondence: malina@big.ac.cn (M.L.N.), zhangzhang@big.ac.cn (Z.Z.)

19

# 1    **Summary**

2    To explore glioma biomarkers with high specificity, enable non-invasive detection and  
3    possess clinical significance, we perform large-scale integrative analyses on multi-omics  
4    multi-cohort datasets collected from public resources. We identify *PRKCG* as a brain-  
5    specific gene that is highly expressed in cerebrospinal fluid, thus achieving higher  
6    specificity and detectability in the periphery. Importantly, *PRKCG* bears great potential in  
7    clinical application for glioma diagnosis, prognosis, and treatment prediction, which have  
8    been consistently testified on a number of independent discovery and validation datasets  
9    consisting of multi-omics molecular profiles and different ethnic populations/countries.  
10    Based on the comprehensive characterization of multi-omics molecular profiles, our  
11    findings suggest the reliability and potential application of *PRKCG* as a biomarker for  
12    glioma.

13    **Keywords:** glioma, multi-omics, *PRKCG*, biomarker, cerebrospinal fluid

14

# 15    **Significance**

16    Glioma is one of the most lethal human malignancies and exhibits low resection rate and  
17    high recurrence risk. Powered by high-throughput sequencing technologies, the public  
18    availability of vast amounts of multi-omics molecular datasets provides unprecedented  
19    opportunities to identify effective biomarkers for glioma. Here, we assemble a large-scale  
20    collection of multi-omics multi-cohort glioma datasets from public resources. Our  
21    integrative molecular analyses reveal that *PRKCG* achieves higher specificity and  
22    detectability in the periphery and bears the significant potential in glioma diagnosis,

1 prognosis and treatment prediction as testified on different datasets. Our study features  
2 comprehensive molecular characterization of *PRKCG* in glioma and highlights the value  
3 of integrative multi-omics data analysis toward accurate therapeutic strategies and  
4 precision healthcare in the era of big data.

5

6

7

8

9

10

11

12

13

14

15

16

17

# 1    **Introduction**

2    Glioma, one of the serious central nervous system (CNS) tumors, represents 80% of  
3    malignant brain tumors (A.Maher. et al., 2019; Schwartzbaum et al., 2006) and features  
4    low resection rate and high recurrence risk (Stewart, 2002). Since tumor classification  
5    benefits accurate diagnosis and facilitates precise treatment, gliomas can be classified,  
6    according to the 2007 World Health Organization (WHO) grading scheme (Louis et al.,  
7    2007), into low-grade gliomas (LGG: astrocytoma, oligodendroglioma,  
8    oligoastrocytoma) and high-grade gliomas (GBM: glioblastoma). Therefore,  
9    identification of effective biomarkers for precise classification of different-grade gliomas  
10    is crucial to aid tumor diagnosis, establish appropriate therapies, recognize prognostic  
11    outcome and predict therapeutic response (Cancer Genome Atlas Research et al., 2015;  
12    Wesseling et al., 2011).

13    Powered by high-throughput sequencing technologies, a set of molecular biomarkers  
14    have been discovered from different omics levels to assist glioma diagnosis and treatment  
15    (Kim et al., 2013; Wiestler et al., 2013). Among them, isocitrate dehydrogenase (*IDH*)  
16    mutation and 1p/19q co-deletion (1p/19q code) are two most important molecular  
17    signatures for glioma grading (Cohen et al., 2013; Eckel-Passow et al., 2015; Waitkus et  
18    al., 2018). Patients with *IDH* mutation (*IDH*-mut) have longer survival than those with  
19    *IDH* wild-type (*IDH*-WT) (Cohen et al., 2013; Guo et al., 2011; Ichimura et al., 2009;  
20    Kloosterhof et al., 2011; Turcan et al., 2012). And the 1p/19q code is a distinctive feature  
21    of oligodendroglioma (Cairncross et al., 2013; Eckel-Passow et al., 2015; Jenkins et al.,  
22    2006; van den Bent et al., 2013). Furthermore, based on these two signatures,  
23    accumulated evidence suggested that gliomas can be divided into three subtypes (*IDH*-

mut & 1p/19q code, *IDH*-mut & 1p/19q non-code, and *IDH*-WT & 1p/19q non-code), which are associated with diverse clinical outcomes (Mur et al., 2015). Accordingly, in 2016, the WHO combined histology and genetic signatures to divide gliomas into five categories (Molinaro et al., 2019), including three low-grade gliomas (diffuse astrocytoma, *IDH*-mut & 1p/19q non-code; oligodendroglioma, *IDH*-mut & 1p/19q code; diffuse astrocytoma, *IDH*-WT & 1p/19q non-code) and two high-grade gliomas (GBM, *IDH*-mut; GBM, *IDH*-WT) (see a review in (Louis et al., 2016)). Meanwhile, biomarkers at the transcriptome level have also been identified (Flynn et al., 2008; Wang et al., 2016); for example, an increased expression of Epidermal Growth Factor Receptor (*EGFR*) has been reported to associate with malignant progression of gliomas (Fan et al., 2009; van den Bent et al., 2015; Verhaak et al., 2010). In addition, epigenetic modifications are also implicated in glioma (Esteller, 2007; Park et al., 2014; Zhang et al., 2017). One classical biomarker is O6-methylguanine-DNA-methyltransferase (*MGMT*) (Binabaj et al., 2018; Donson et al., 2007); patients with methylated *MGMT* promoter have better clinical outcomes and are more sensitive to the alkylating chemotherapy than those without methylated *MGMT* promoter (Binabaj et al., 2018; Hegi et al., 2005; Rivera et al., 2010; Wick et al., 2014).

Although tremendous efforts have been devoted for better understanding of glioma tumorigenesis and identification of molecular biomarkers, existing glioma biomarkers have several drawbacks. First, they are lack of glioma specificity. For instance, the *IDH* mutation has also been identified as a biomarker in other tumor types including acute myeloid leukemia (AML) (Dang et al., 2010; Dang et al., 2016), chondrosarcoma and intrahepatic cholangiocarcinoma (Kerr et al., 2013). Second, existing biomarkers are

1 unable to differentiate glioma subtypes with high accuracy, which would be beneficial to  
 2 glioma grading and personalized medicine. Third, although biomarkers have been  
 3 discovered to aid the prognosis and prediction of GBM (Hu et al., 2018; McNamara et al.,  
 4 2013) and LGG (Cancer Genome Atlas Research et al., 2015; Wesseling et al., 2015),  
 5 they are incapable to reflect the progression from low- to high-grade gliomas. Last but  
 6 foremost, considering the practical significance of detectability in periphery, genetic  
 7 tumor profiling based on extant biomarkers yet involves brain surgery (Miller et al.,  
 8 2019), limiting its clinical applicability for glioma diagnosis and prognosis.

9 The public availability of multi-omics datasets for glioma (Cancer Genome Atlas  
 10 Research et al., 2015; Ceccarelli et al., 2016; Zhao et al., 2019) as well as cerebrospinal  
 11 fluid (CSF) which is the only accessible source to obtain genes stemmed from human  
 12 CNS (Miller et al., 2019; Mouliere et al., 2018; Sasayama et al., 2017), provides  
 13 unprecedented opportunities for identifying biomarkers without craniotomy operation and  
 14 comprehensively characterizing the pathophysiology of brain tumors. To this end, we  
 15 collected a large-scale assemble of multi-omics multi-cohort datasets from public  
 16 resources, established a methodological strategy on integrative identification of  
 17 biomarkers with higher specificity and feasible detectability from periphery, and revealed  
 18 that *PRKCG* is specifically expressed in brain and also detectable in CSF. Through  
 19 comprehensive integrative analyses on a total of five discovery datasets and fourteen  
 20 validation datasets, we systematically characterized *PRKCG* as a potential biomarker for  
 21 glioma diagnosis, prognosis and treatment prediction.

# 1 **STAR Methods**

## 2 ***Data collection***

3 In this study, we collected a comprehensive assemble of multi-omics datasets (including  
4 genomics, transcriptomics, DNA methylomics and proteomics) from The Cancer Genome  
5 Atlas (TCGA, <https://portal.gdc.cancer.gov/>) (Ceccarelli et al., 2016), Genotype-Tissue  
6 Expression Portal (GTEx, <https://gtexportal.org/home/>) (John Lonsdale, 2013), Gene  
7 Expression Omnibus (GEO, <https://www.ncbi.nlm.nih.gov/geo/>), Ivy Glioblastoma Atlas  
8 Project (Ivy GAP, <http://glioblastoma.alleninstitute.org>) (Puchalski. et al., 2018) and  
9 Chinese Glioma Genome Atlas (CGGA, <http://www.cgga.org.cn>) (Bao et al., 2014; Sun et  
10 al., 2014). Particularly, discovery datasets were derived from TCGA, GTEx and large  
11 cohort studies in GEO (GSE83710, GSE16011 and GSE36278 for protein, expression  
12 and methylation, respectively). As a result, a total of five discovery datasets and fourteen  
13 validation datasets were obtained. For convenience, each dataset collected in this study is  
14 assigned a unique accession number with the format: [D/V][*i*]-  
15 [TCGA/GTEx/GEO/CGGA/Ivy GAP]-[E/V/P/M], where D/V in the first bracket  
16 represents the dataset for discovery or validation, *i* in the second bracket indicates the  
17 dataset number, the third bracket shows the data source (as mentioned above), and the last  
18 bracket indicates the data type, namely, E for RNA expression, V for CNV, P for protein  
19 expression and M for DNA methylation, respectively. The detailed information about all  
20 collected datasets was tabulated in Table 1.

## 21 ***Identification of brain-specific genes***

1 To identify brain-specific genes, we used the RNA-Seq dataset from GTEx (2016-01-15;  
2 v7) (John Lonsdale, 2013), which contains 11,688 samples across 53 tissue sites of 714  
3 donors. Considering that several tissues have multiple different sites, gene expression  
4 levels were averaged over sites that are from the same tissue. To reduce background  
5 noise, genes with maximal expression levels smaller than 10 TPM (Transcripts Per  
6 Million) were removed. Finally, we obtained a total of 15,176 gene expression profiles  
7 across 30 tissues (Table S1).

8 Based on the expression levels across 30 tissues, we calculated the tissue specificity  
9 index  $\tau$  (Yanai et al., 2005) for each gene to identify tissue-specific genes.  $\tau$  is valued  
10 between 0 and 1, where 0 represents housekeeping genes that are consistently expressed  
11 in different tissues, and 1 indicates tissue-specific genes that are exclusively expressed in  
12 only one tissue (Yanai et al., 2005). In this study, brain-specific genes were defined as  
13 those genes that are maximally expressed in the brain with  $\tau > 0.9$ . As a consequence, a list  
14 of the top 100 brain-specific genes ranked by the  $\tau$  index were obtained for further  
15 analysis (Table S2).

## 16 *Sample classification*

17 To comprehensively study the potential of *PRKCG* in glioma diagnosis, we compared its  
18 molecular profiles between normal and glioma samples, between LGG and GBM  
19 samples, between primary GBM (pGBM) and recurrent GBM (rGBM) samples, and  
20 between glioma samples with different anatomic features. We collected 122 GBM  
21 samples from the Ivy GAP database (Puchalski. et al., 2018) and grouped them according  
22 to their anatomic regions, namely, leading edge (LE, the ratio of tumor/normal cells is

1 about 1–3/100), infiltrating tumor (IT, the ratio of tumor/normal cells is about 10–  
2 20/100), cellular tumor (CT, the ratio of tumor/normal cells is about 100/1 to 500/1),  
3 pseudo-palisading cells around necrosis (PAN, the narrow boundary of cells along the  
4 dead tissue), and microvascular proliferation (MVP, two or more blood vessels sharing a  
5 common vessel wall of endothelial).

6 To investigate the prognostic role of *PRKCG*, for each dataset we divided samples into  
7 three groups based on its expression/methylation level, where the top 25% are “High”,  
8 the 25%-75% are “Middle”, and the remaining are “Low”. When exploring the predictive  
9 role of *PRKCG*, we obtained methylation status (methylated and unmethylated) directly  
10 from the original study (Ceccarelli et al., 2016), which was defined based on the beta  
11 value cutoff 0.3.

## 12 ***Identification of PRKCG-like genes***

13 *PRKCG*-like genes were identified by adopting the following criteria (Figure S1): (1)  
14 Higher methylation level of at least one CpG site (promoter region; 450K) in glioma  
15 samples than normal samples; (2) Higher DNA methylation level in LGG samples than  
16 GBM samples; (3) Higher expression level in LGG samples than GBM samples; and (4)  
17 Lower expression level in glioma samples than normal samples. As a result, we obtained  
18 a total of 720 genes, which were further divided into two groups according to their  
19 correlations between gene expression and methylation, namely, 193 genes with positive  
20 correlation and 269 genes with negative correlation. These 193 genes were considered as  
21 *PRKCG*-like genes.

## 22 ***Statistical analysis***

1 All statistical analyses were performed using R version 3.3.2. The Wilcoxon test was  
2 used for the analysis of the difference in gene expression/methylation between tumor and  
3 normal samples, and between different glioma subtypes. The statistical significance levels  
4 were coded by *ns* (not significant)  $p > 0.05$ , \*  $p < 0.05$ , \*\*  $p < 0.01$  and \*\*\*  $p < 0.001$ .

5 We performed the survival analysis using the Kaplan-Meier method and estimated the  
6 statistical difference using the log-rank test. To identify whether age or gender might  
7 exert an influence on survival, the Cox proportional hazards regression model was  
8 applied to the univariate and multivariate analyses.

### 9 ***Lead contact and materials availability***

10 This study did not generate new unique reagents. Further information and requests for  
11 resources should be directed to and will be fulfilled by the Lead Contact, Z.Z.  
12 (zhangzhang@big.ac.cn).

### 13 ***Data availability statement***

14 All datasets integrated in this study were obtained from multiple public database  
15 resources (see details in Table 1), which are freely available at  
16 [ftp://download.big.ac.cn/glioma\\_data/](ftp://download.big.ac.cn/glioma_data/).

## 17 **Results**

### 18 ***PRKCG is a brain-specific gene and detectable in cerebrospinal fluid***

19 To identify glioma biomarkers with high brain specificity, we integrated expression data  
20 from GTEx (D1-GTEx-E) (John Lonsdale, 2013), explored genes' expression profiles  
21 and their tissue-specificity, and identified a list of top 100 brain-specific genes (Table S2).

1 To achieve the detectability in the periphery, we assembled a total of 1,126 CSF-  
 2 detectable proteins from GEO GSE83710 (D2-GSE83710-P) (Sasayama et al., 2017), due  
 3 to the critical significance of CSF as the only feasible way to detect genes expressed in  
 4 human CNS. After integrating brain-specific genes with CSF proteins, we found that  
 5 there are five brain-specific proteins that can be detected in CSF (Figures 1 and S2), in  
 6 terms of fluorescence intensity from low to high, namely, *CAMK2A*, *GFAP*, *OPCML*,  
 7 *BCAN* and *PRKCG*, which are diversely expressed in different brain regions (Figure S3).  
 8 Specifically, *CAMK2A* is a calcium calmodulin-dependent protein kinase and reduced  
 9 expression of *CAMK2A* is associated with better survival in GBM (John et al., 2017;  
 10 Long et al., 2017). *GFAP*, encoding one of the major intermediate filament proteins of  
 11 mature astrocytes (Horst et al., 2007), can be used to assess the differentiation state of  
 12 astrocytoma (van Bodegraven et al., 2019). *OPCML* encodes a member of the IgLON  
 13 subfamily in the immunoglobulin proteins and is down-regulated in gliomas and other  
 14 brain tumors (Carminati. et al., 2010; Reed et al., 2007). *BCAN*, a member of the lectican  
 15 family of chondroitin sulfate proteoglycans, is highly expressed in glioma and may  
 16 promote cell motility of brain tumor cells (Phillips et al., 2006; Sydney C. Gary, 2000). In  
 17 addition, the fusion event between *BCAN* and *NTRK1* (*BCAN-NTRK1*) is a potential  
 18 glioma driver and therapeutic target (Cook et al., 2018).

19 Remarkably, *PRKCG* (Protein Kinase C Gamma), a member of protein kinase C (PKC)  
 20 family, exhibits higher fluorescence intensity than the other four genes (Figures 1 and  
 21 S2). Previous studies have documented that unlike other PKC family members that are  
 22 expressed in many tissues aside from brain, *PRKCG* is brain-specifically expressed and  
 23 its localization is restricted to neurons (Saito and Shirai, 2002) and that mutations in

1 *PRKCG* are associated with spinocerebellar ataxia (Klebe et al., 2005; Yabe et al., 2003).  
 2 Additionally, it has been reported that PKC signaling pathways contribute to the  
 3 aggressive behavior of glioma cells (do Carmo et al., 2013) and atypical PKC isoforms  
 4 are fundamental regulators of tumorigenesis (Reina-Campos et al., 2019). Despite this,  
 5 the potential role of *PRKCG* in glioma remains unknown, and therefore, comprehensive  
 6 molecular characterization of *PRKCG* across multi-omics glioma datasets is highly  
 7 desirable.

### 8 ***PRKCG is a potential biomarker for glioma diagnosis and prognosis***

9 First, we explored the expression profile of *PRKCG* across multiple brain developmental  
 10 stages, and revealed that its expression is extremely lower in the prenatal stages, but  
 11 dramatically increased in the infancy stages and then stabilized in the latter stages using  
 12 the data of GenTree (Shao et al., 2019) (Figure S4). Moreover, using a total of 607  
 13 TCGA glioma samples, we identified its co-expressed genes (Table S3;  $p$ -value  $< 0.01$ ,  
 14  $r^2 > 0.8$ ) and performed the gene ontology analysis, showing that *PRKCG* co-expressed  
 15 genes are significantly associated with “chemical synaptic transmission”, “axon”, and  
 16 “GABA-A receptor activity”.

17 Next, we compared the expression profiles of *PRKCG* between normal and glioma  
 18 samples. We found that *PRKCG* expression is significantly reduced in gliomas by  
 19 contrast to normal samples, and this reduced expression is consistently observed in  
 20 multiple datasets (Figure 2A to 2F;  $p$ -value  $< 0.01$ , Wilcoxon test). Then, using data  
 21 collected from the Ivy GAP database (Puchalski. et al., 2018) (see Methods), we explored  
 22 the expression of *PRKCG* among GBMs from different anatomic regions. As expected,

1 *PRKCG* shows significantly different expression patterns among these anatomic regions;  
 2 its expression is highest in LE (the outermost boundary of the tumor), significantly  
 3 decreased in IT (the intermediate zone between the LE and the serious CT regions), and  
 4 lowest in the serious regions (CT, PAN and MVP) (Figure 2G;  $p$ -value  $< 0.01$ , Wilcoxon  
 5 test). We further examined *PRKCG* expression in gliomas with different grades, and  
 6 found that its expression level is significantly lower in GBM samples than LGG samples  
 7 (Figure 2H to 2J;  $p$ -value  $< 0.01$ , Wilcoxon test). Collectively, these results demonstrate  
 8 that the reduced expression of *PRKCG* is not only associated with glioma, but also  
 9 associated with glioma progression in a quantitative manner, highlighting its potential for  
 10 glioma diagnosis and prognosis.

11 Since *PRKCG* harbors two CpG sites (namely, cg26626089 and cg04518808) that are  
 12 located in the promoter region and covered in both HumanMethylation27 (27K) and  
 13 HumanMethylation450 (450K) BeadChip datasets, we systematically investigated DNA  
 14 methylation profiles of these two sites (Figure 3). Using the four independent datasets  
 15 from D5-GSE36278-M (Sturm et al., 2012), V8-GSE50923-M (Lai et al., 2014), V9-  
 16 GSE61160-M (Mur et al., 2013) and V10-CGGA-M (Zhang et al., 2013), we found that  
 17 cg26626089 is significantly hyper-methylated in GBM patients compared with normal  
 18 samples (Figure 3A and 3C;  $p$ -value  $< 0.01$ , Wilcoxon test). The other CpG site  
 19 cg04518808, albeit not significantly, is also observed to be hyper-methylated in GBM  
 20 patients (Figure 3B and 3D;  $p$ -value  $> 0.05$ , Wilcoxon test). Furthermore, we examined  
 21 the variation of methylation level using whole-genome bisulfite sequencing data of six  
 22 GBM samples from TCGA and one normal sample from UCSC (2017 version;  
 23 <http://genome.ucsc.edu>, last accessed on 12 May 2019). Consistently, we observed that

1 most GBM patients show higher methylated promoter region than normal samples  
2 (Figure S5). In addition, considering different grading gliomas, we observed that both  
3 sites present much lower methylation levels in GBM samples than LGG samples (Figure  
4 3E to 3H;  $p$ -value  $< 0.01$ , Wilcoxon test).

5 Collectively, *PRKCG* exhibits differential molecular profiles in normal and glioma  
6 samples. Compared with normal samples, *PRKCG* presents lower expression and higher  
7 methylation in glioma samples. With tumor malignancy, *PRKCG* expression and  
8 methylation are both on the decrease (discussed later). These results suggest *PRKCG* as a  
9 potential biomarker for glioma diagnosis and prognosis.

#### 10 ***PRKCG is significantly associated with survival***

11 To further investigate the prognostic potential of *PRKCG*, we conducted the survival  
12 analysis with samples' expression data and survival information. We discovered that  
13 higher *PRKCG* expression is associated with longer overall survival (Figure 4A;  $p$ -value  
14  $< 0.01$ , log-rank test). Remarkably, this is consistently observed in three independent  
15 validation datasets (Figure 4B to 4D;  $p$ -value  $< 0.01$ , log-rank test). The univariate and  
16 multivariate Cox regression analyses also revealed that *PRKCG* expression is statistically  
17 significantly associated with patients' survival (Table 2;  $p$ -value  $< 0.01$ ).

18 DNA methylation is implicated in transcriptional regulation and may play a central role in  
19 the generation of phenotypic instability (Baylin, 2005). Accordingly, we further  
20 investigated whether *PRKCG* methylation is associated with clinical outcome. Based on  
21 two independent datasets from TCGA ( $n = 862$ ) and CGGA ( $n = 151$ ), we observed that  
22 higher methylation level of the site cg04518808 is significantly associated with better

1 survival (Figure S6A and S6B;  $p$ -value  $< 0.01$ , log-rank test). The other site cg26626089  
 2 exhibits similar effect, but is statistically insignificant in the CGGA dataset presumably  
 3 due to smaller sample size (Figure S6C,  $p$ -value  $< 0.01$ , log-rank test; Figure S6D,  $p$ -  
 4 value = 0.3, log-rank test). However, we found that the averaged methylation level of the  
 5 two sites is a more powerful and robust prognostic biomarker; higher *PRKCG*  
 6 methylation indicates better survival outcome, which is less affected by the sample size  
 7 (Figure 5A and 5B;  $p$ -value  $< 0.01$ , log-rank test). Moreover, the univariate and  
 8 multivariate Cox analyses excluded the age and gender as confounding variables  
 9 affecting patients' survival as well (Table 2;  $p$  value  $< 0.01$ ).

10 Since *PRKCG* is located on 19q13.42, *PRKCG* CNV is most likely correlated with the  
 11 status of 19q and thus may be associated with clinical outcome. Therefore, we  
 12 investigated these relationships using 1,018 samples from TCGA (Figure 6). Consistent  
 13 with our expectation, the copy number status of *PRKCG* is accompanied by 19q gain/loss  
 14 (Figure 6A). As 1p/19q codeletion is an acknowledged prognostic biomarker for glioma, we  
 15 adopted both 1p/19q codeletion and *PRKCG* to further divide gliomas into four groups:  
 16 *PRKCG* normal, *PRKCG* gain, *PRKCG* loss & 1p/19q codeletion, and *PRKCG* loss & 1p/19q  
 17 non-codeletion. Interestingly, patients under these four groups present significantly different 5-  
 18 year overall survival (OS) rates, which, from better to worse, are 82% for 1p/19q codeletion,  
 19 42% for 1p/19q non-codeletion, 20% for *PRKCG* (19q) normal, and  $< 8\%$  for *PRKCG* (19q)  
 20 gain, respectively (Figure 6A;  $p$  value  $< 0.01$ , log-rank test). These results indicate that  
 21 one single biomarker might not be sufficient for accurate and reliable prognosis. We  
 22 illustrated the survival rates and the distributions of age, WHO grade and histology across  
 23 the four groups (Figure 6B). Intriguingly, *PRKCG* CNV status is closely associated with

different grading gliomas; nearly all LGG patients are *PRKCG* CNV loss and have relatively young ages, whereas most GBM patients are older and possess *PRKCG* CNV gain. Collectively, multi-omics analyses on expression, methylation and CNV datasets demonstrated that *PRKCG* is a potential prognosis biomarker for glioma.

### ***Combined methylation signatures of PRKCG and MGMT are effective in treatment prediction***

It is known that *MGMT* encodes a DNA-repair protein and hypermethylation of *MGMT* is associated with diminished DNA-repair activity, accordingly allowing the alkylating drug temozolomide (TMZ) to have greater effect in GBM treatment (Donson et al., 2007; Fukushima et al., 2009; Hegi et al., 2005; Stupp et al., 2005). In our study, consistently, we found that patients with methylated *MGMT* are more sensitive to TMZ treatment than those with unmethylated *MGMT* (Figure 7A;  $p$ -value < 0.01, log-rank test).

Considering that a single biomarker might be lack of sufficient prediction power and thus fail to determine the clinical therapeutic efficacy due to tumor heterogeneity (Li et al., 2018), we sought to examine the predictive potential of *PRKCG* for TMZ using 228 glioma samples with matched DNA methylation and clinical data from TCGA. We discovered that among the two CpG sites of *PRKCG* (cg26626089 and cg04518808), the methylation level of cg26626089 is able to classify patients into two groups with distinct survival advantages, as patients with methylated cg26626089 have significantly longer survival than those with unmethylated cg26626089 (Figure 7B;  $p$ -value < 0.01, log-rank test; Table 2,  $p$ -value < 0.01). In contrast, cg04518808 is unable to be used for glioma classification (Figure S7A,  $p$ -value > 0.05, log-rank test). By combining *PRKCG*

(cg26626089) with *MGMT*, intriguingly, GBM patients receiving TMZ treatment can be classified into four groups that exhibit significantly different survivals (Figures 7C and S7B;  $p$ -value < 0.01, log-rank test). The four groups, namely, *MGMT*-unmethylated + *PRKCG*-unmethylated, *MGMT*-unmethylated + *PRKCG*-methylated, *MGMT*-methylated + *PRKCG*-unmethylated, and *MGMT*-methylated + *PRKCG*-methylated, present gradually improved longer survivals, as their 20-month OS rates are 0.18, 0.29, 0.39 and 0.51 (Figure 7C), respectively. Therefore, the combined methylation signatures of *PRKCG* and *MGMT* can be utilized to guide more accurate glioma stratification and achieve better personalized therapeutic decisions.

## Discussion

With the rapid advancement of sequencing technologies, there has been an increasing number of high-throughput studies on glioma, resulting in massive multi-omics multi-cohort datasets generated from different projects and laboratories throughout the world. Therefore, it has become crucially significant on how to make full use of these valuable data for comprehensive molecular identification of glioma biomarkers. In this study, we for the first time, assembled the most comprehensive collection of public glioma datasets with multi-omics data types and different populations/countries and established a methodological strategy on integrative identification of biomarkers with higher specificity and feasible detectability from periphery. Based on these, we performed comprehensive molecular characterization of *PRKCG* as a biomarker for glioma diagnosis, prognosis and treatment prediction, which have been consistently verified across multiple independent discovery and validation datasets (Figures 2 to 5). Specifically, 1) *PRKCG* presents lower expression and higher methylation in glioma

1 samples, which, with tumor malignancy, are both decreasing; 2) *PRKCG* is associated  
 2 with glioma progression, as its expression change from high to low is indicative of  
 3 glioma progression from low-grade to high-grade; 3) High RNA expression, high DNA  
 4 methylation, and low copy number, are all suggestive of good survivals (discussed  
 5 below); 4) Patients with DNA methylation in both *PRKCG* and *MGMT* are more sensitive  
 6 to TMZ treatment, suggesting the effectiveness of combined application of *PRKCG* with  
 7 the classical biomarker *MGMT* to achieve more precise survival after TMZ  
 8 chemotherapy. Although it has been documented that *PRKCG* is up-regulated in colon  
 9 cancer and loss of *PRKCG* inhibits cell migration and enhances the proliferation  
 10 (Catriona M. Dowling and Kiely, 2017), the up-regulation in colon cancer, as a matter of  
 11 fact, is extremely lower by comparison with glioma (LGG and GBM) (Figure S8). Thus,  
 12 unlike previous efforts that most discovered biomarkers at single omics level and with  
 13 limited samples, our findings highlight the importance of integrative multi-omics multi-  
 14 cohort data analysis and represents a data-driven blueprint toward accurate therapeutic  
 15 decisions and precision healthcare in cancer research.

16 Taking advantage of the comprehensive datasets, we explored how *PRKCG* is regulated  
 17 in glioma. Obviously, *PRKCG* is a glioma tumor suppressor gene significantly repressed  
 18 from normal brain tissue to glioma (Figure 2). At the same time, we found that most of  
 19 the GBM patients show higher methylated *PRKCG* than normal samples (Figure 3).  
 20 Noting that high methylation on the promoter region may lead to low expression (Herman  
 21 and Baylin, 2003), it is most likely that *PRKCG* expression is significantly negatively  
 22 affected by its methylation. However, it does not follow this rule in the comparison  
 23 between LGG and GBM; LGG exhibits both higher methylation level and higher

1 expression level than GBM (Figures 2 and 3). In fact, multi-omics profiles of *PRKCG* are  
 2 in harmony with classical biomarkers (Figure 8A); *PRKCG* methylation (cg26626089) is  
 3 associated with *IDH* status, consistent with a previous finding that *IDH*-mut is associated  
 4 with high methylation (Christensen et al., 2011). As LGG samples are always associated  
 5 with *IDH*-mut and GBM samples are associated with *IDH*-WT, it is not difficult to  
 6 understand why the methylation level of *PRKCG* is significantly lower in GBM than in  
 7 LGG. Such higher expression level and higher methylation level lead to the suspicion  
 8 whether *PRKCG* expression in glioma is positively regulated by its DNA methylation or  
 9 is attributable to its CNV.

10 Surprisingly, *PRKCG* CNV is positively correlated with its expression, as expected  
 11 within the CNV loss/gain group (Figure 8B and 8C;  $p$ -value  $< 0.01$ , Spearman correlation  
 12 = 0.26/0.32), while it exhibits a contradictory negative association in the group of all  
 13 CNV status (Figure 8D). According to the dosage effect theory (Henrichsen et al., 2009),  
 14 the CNV loss group should not express more *PRKCG* than the CNV gain group. This  
 15 implies that there is probably another factor rather than CNV to dominantly regulate  
 16 *PRKCG* expression in glioma. Although it contradicts the commonly accepted negative  
 17 association between gene expression and promoter CpG methylation, a large-scale pan-  
 18 cancer analysis has revealed positive correlation between promoter CpG methylation and  
 19 gene expression (John CG Spainhour, 2019). Consistently, we did observe significant  
 20 positive correlations between *PRKCG* expression and CpG methylation within the  
 21 promoter region (Figure 8E and 8F). This positive regulation of CpG methylation could  
 22 be quite strong, which significantly improves *PRKCG* expression in LGG samples; even  
 23 these samples exhibit obvious CNV loss (Figure 8A).

Therefore, *PRKCG* is most likely regulated in different directions by DNA methylation, which negatively regulates *PRKCG* expression from normal to tumor, while positively regulates the expression within tumor. This finding does challenge our understanding of methylation regulation. To analyze whether this kind of regulation has any biological significance, we characterized and identified 462 glioma suppressor genes that tend to be regulated by DNA methylation (Table S4) (described in Methods). Among the 462 genes, 269 genes show negative correlations between methylation level and expression level, whereas 193 genes show positive correlations (Figure S9A; Table S4) that are exactly *PRKCG*-like. Intriguingly, the two groups' genes are enriched in different pathways. The negatively correlated genes are significantly enriched in the pathways of "Neuroactive ligand-receptor interaction", "cAMP signaling pathway", "cGMP-PKG signaling" and "Morphine addiction", whereas the *PRKCG*-like genes are significantly enriched in the pathways of "Ras signaling", "Dopaminergic synapse" and "Glutamatergic synapse" (Figure S9B). Thus, *PRKCG*-like genes presumably present heterogeneous roles in tumorigenesis with complex molecular mechanisms that need further extensive explorations both bioinformatically and experimentally.

*PRKCG* is located on the chromosome 19q13.42, unifying previous findings that 1p/19q code is closely associated with glioma. Consistently, *PRKCG* CNV is associated with 19q status (Figure 6A). To our knowledge, in addition to *PRKCG*, other genes (e.g., *TTYH1*, *UBE2S*) (Hu et al., 2017; Jung et al., 2017) that are located in 19q, are also linked with glioma. However, it is still unclear why 19q is associated with patients' status and what is the driving force responsible for the variation of these associated genes. Interestingly, different from other genes as mentioned above, *PRKCG* (as well as other

1 four genes identified in this study, viz., *GFAP*, *BCAN*, *CAMK2A* and *OPCML*) is a highly  
 2 brain-specifically expressed gene and its protein is abundant in CSF, accordingly  
 3 achieving higher specificity and enabling practical detectability from periphery without  
 4 surgery operation. Nevertheless, it is noted that the CSF data used in this study involves  
 5 1,126 proteins across 133 normal samples (Sasayama et al., 2017). In fact, it would be  
 6 more desirable and helpful to compare the *PRKCG* protein pattern in CSF across normal  
 7 and glioma samples (ideally with different grades). Therefore, future inclusion of more  
 8 glioma CSF datasets is needed to systematically characterize the diagnostic variables and  
 9 their association to more precision clinical subtypes.

10 Particularly, although it is well-known that *MGMT* hypermethylation status is associated  
 11 with longer survival (Donson et al., 2007), here for the first time, we revealed that within  
 12 different status of *MGMT* (methylated or unmethylated), patients with methylated  
 13 *PRKCG* (cg26626089) always show better treatment outcome. *MGMT* encodes a DNA-  
 14 repair protein, and elevated *MGMT* expression is associated with TMZ resistance  
 15 (Donson et al., 2007). Not surprisingly, the methylated groups with better survivals show  
 16 significantly lower expression of *MGMT* than the unmethylated groups (Figure S7C).  
 17 Why would the combination of *MGMT* methylation with *PRKCG* methylation indicate an  
 18 even better survival? According to our results, *PRKCG* is potentially a glioma suppressor  
 19 gene. Therefore, the elevated expression of *PRKCG* positively regulated by DNA  
 20 methylation would promote the inhibition of tumor cells and thus exhibit a better effect  
 21 when combined with *MGMT*. In the future, it is necessary to collect a large number of  
 22 samples to elucidate the mechanisms behind. Also, it is crucial to identify more predictive

1 biomarkers for accurate stratification, precise clinical treatment, and improved healthcare  
2 in oncology (La Thangue and Kerr, 2011).

3 The occurrence and development of glioma is a complicated heterogeneous process. In  
4 our study, *PRKCG* performs well in differentiating normal, LGG, and GBM samples and  
5 predicting patients' survival states. However, in pGBM and rGBM, we obtained  
6 contradictory results when applied to different populations; *PRKCG* methylation shows  
7 no significant difference between pGBM and rGBM in the Chinese population (V10-  
8 CGGA-M) (Figure S10A and S10B;  $p$ -value  $> 0.05$ , Wilcoxon test) but significantly  
9 difference in the Switzerland population (V14-GSE60274-M) (Kurscheid et al., 2015)  
10 (Figure S10C and S10D;  $p$ -value  $< 0.05$ , Wilcoxon test). This is most likely caused by the  
11 population genetic difference and/or the small sample size (both datasets have  $< 5$  rGBM  
12 samples). Undoubtedly, comprehensive integrated analysis across multi-omics datasets  
13 and different populations is an inevitable trend in the era of big data, which would greatly  
14 benefit systematic exploration of optimal biomarkers as well as characterization of their  
15 molecular profiles in aid of accurate therapeutic decisions and precision healthcare.

## 16 **Acknowledgments**

17 We thank Jun Yu, Songnian Hu, Fangqing Zhao, Yu Xue, Jiabao Cao, Jian Sang, Guangyi  
18 Niu, Man Li, and Yang Zhang for valuable comments and discussions on this work. This  
19 work was supported by grants from The Strategic Priority Research Program of the  
20 Chinese Academy of Sciences [XDA19050302, XDB13040500], National Key Research  
21 & Development Program of China [2017YFC0907502, 2015AA020108], National  
22 Natural Science Foundation of China [31871328], 13th Five-year Informatization Plan of

1 Chinese Academy of Sciences [XXH13505-05], K. C. Wong Education Foundation to  
2 Z.Z., the Youth Innovation Promotion Association of Chinese Academy of Science  
3 [2019104] to M.L.N., and International Partnership Program of the Chinese Academy of  
4 Sciences [153F11KYSB20160008].

## 5 **Author Contributions**

6 Conceptualization, L.L. and W.G.Y.; Methodology, L.L., W.G.Y., and Z.Z.; Validation,  
7 L.L. and W.L.G.; Formal Analysis, L.L., W.G.Y., W.L.G., Y.C.L. and L.M.W.;  
8 Investigation, L.L. and W.G.Y.; Writing – Original Draft, L.L.; Writing – Review &  
9 Editing, M.L.N., W.L.G., S.S.H., H.L.L., and Z.Z.; Funding Acquisition, M.L.N. and  
10 Z.Z.; Supervision, M.L.N. and Z.Z.

## 11 **Declaration of Interests**

12 The authors declare no competing interests.

13

## 14 **Figures**

15

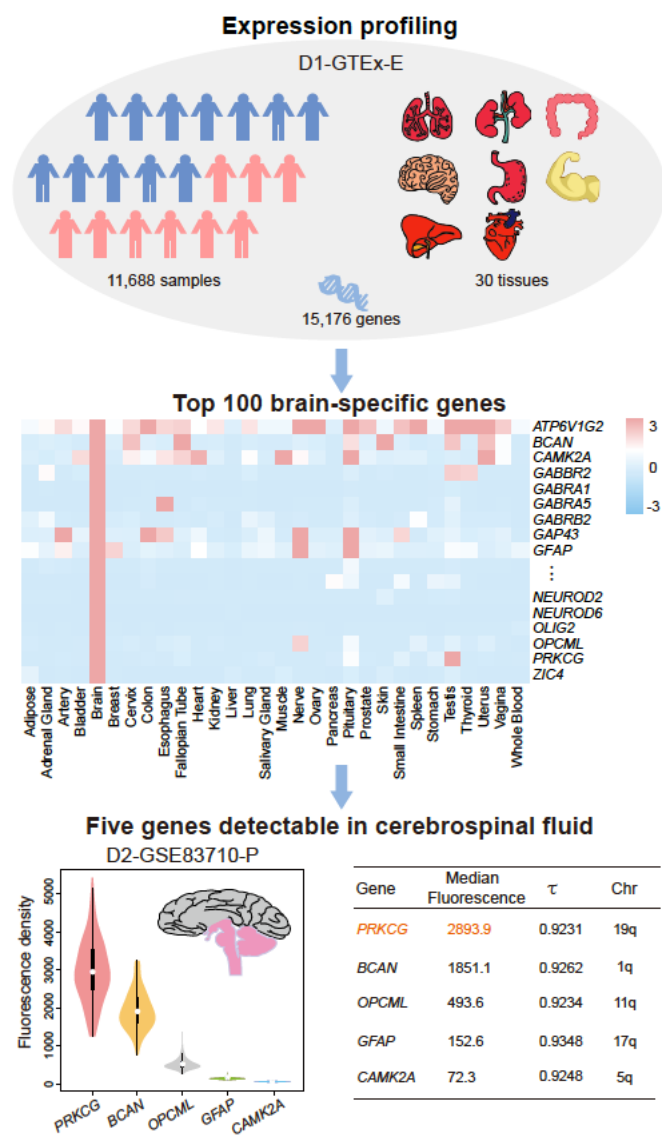

1

2 **Figure 1 Identification of brain-specific and CSF-detectable genes.** Three steps were  
3 involved, namely, detection of brain-specific genes, identification of CSF-detectable  
4 genes, and ranking of candidate genes in light of protein fluorescence. See also Figures  
5 S1 and S2, and Tables S1 and S2.

6

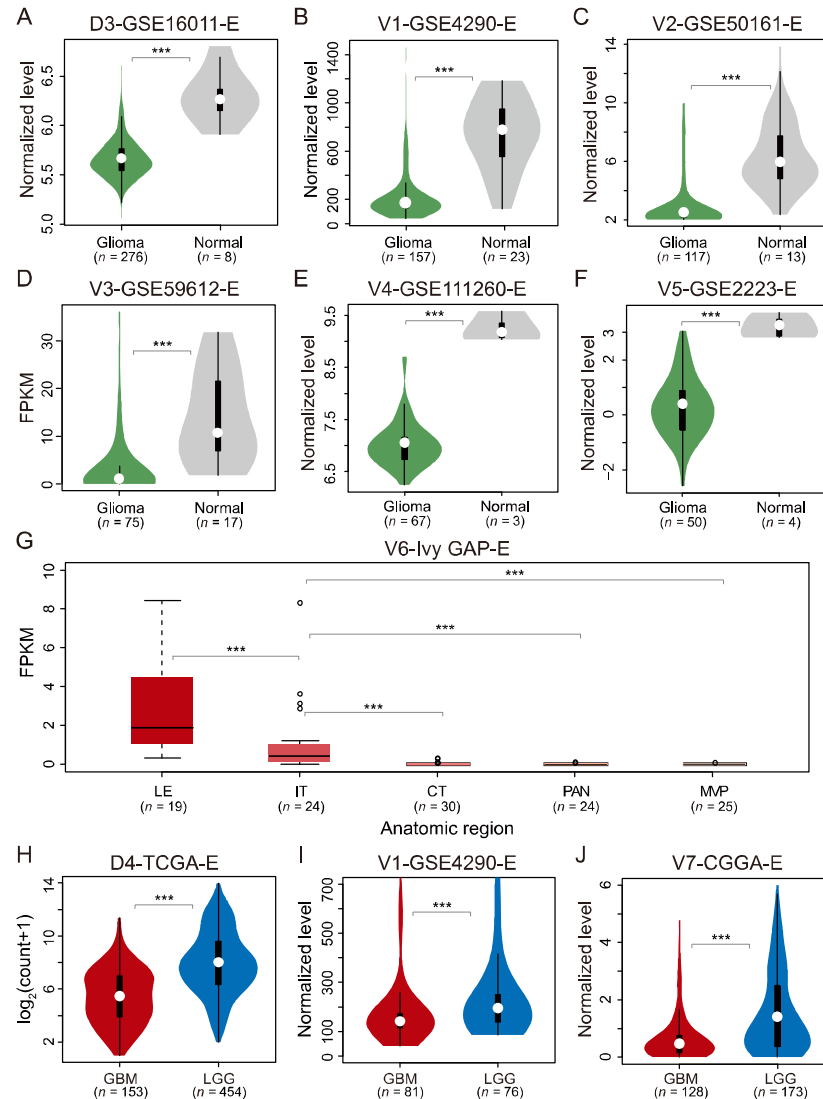

1

2 **Figure 2 Expression profiles of *PRKCG* for glioma diagnosis and prognosis. *PRKCG***

3 expression profiles were compared between glioma and normal samples (D3-GSE16011-

4 E in panel A [RMA normalized], V1-GSE4290-E in panel B [MAS5 normalized], V2-

5 GSE50161-E in panel C [gcRMA normalized], V3-GSE59612-E in panel D, V4-

6 GSE111260-E in panel E [RMA normalized], V5-GSE2223-E in panel F [Lowess

7 normalized]), between different anatomic regions (V6-Ivy GAP-E in panel G), and

8 between GBM and LGG samples (D4-TCGA-E in panel H, V1-GSE4290-E in panel I

9 [MAS5 normalized] and V7-CGGA-E in panel J [Lowess normalized]). All the

1 normalization methods labeled above were derived from and detailed in their  
 2 corresponding publications, and all these datasets were made publicly accessible at  
 3 [ftp://download.big.ac.cn/glioma\\_data/](ftp://download.big.ac.cn/glioma_data/). The Wilcoxon tests were performed and the  
 4 statistical significance levels were coded by: *ns*  $p>0.05$ , \*  $p<0.05$ , \*\*  $p<0.01$  and \*\*\*  
 5  $p<0.001$ .

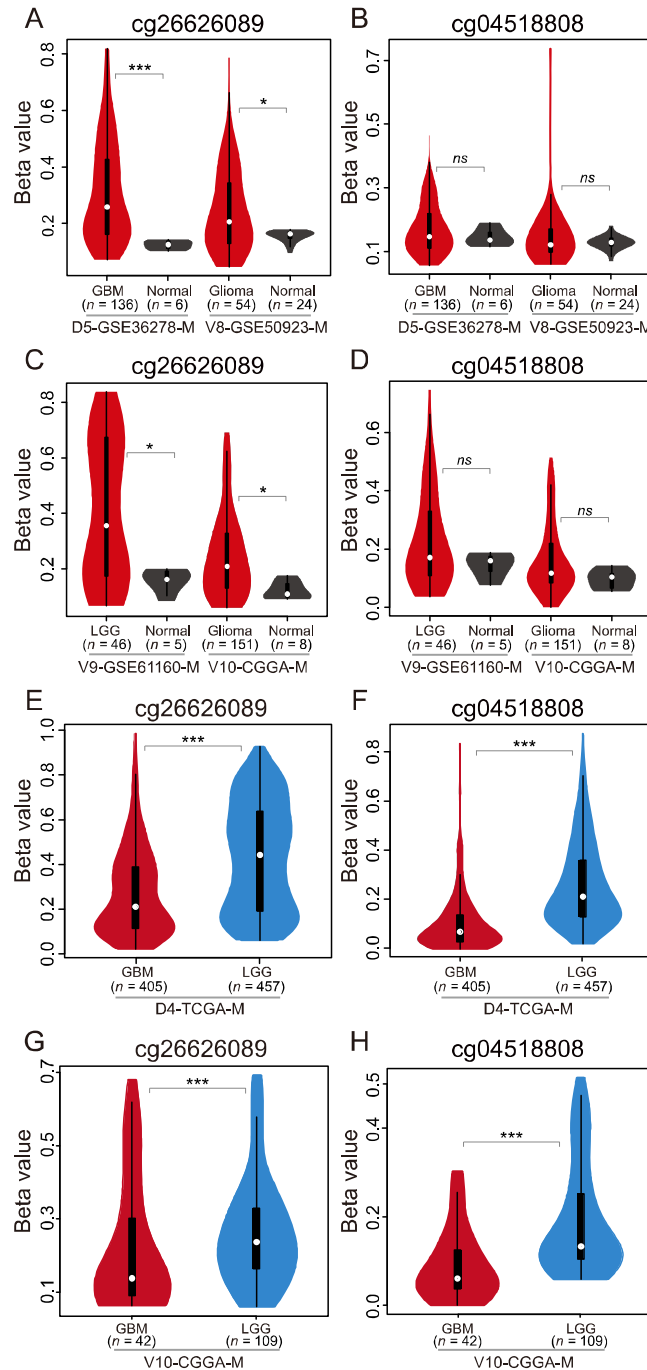

1

2 **Figure 3 DNA methylation profiles of *PRKCG* for glioma diagnosis and prognosis.**

3 *PRKCG* methylation profiles were compared between GBM and normal samples (panels

4 A to D), and between LGG and GBM samples (panels E to H). All these datasets can be

5 publicly accessible at [ftp://download.big.ac.cn/glioma\\_data/](ftp://download.big.ac.cn/glioma_data/). The Wilcoxon tests were

- 1 used and their statistical significance levels were coded by: *ns*  $p > 0.05$ , \*  $p < 0.05$ , \*\*
- 2  $p < 0.01$  and \*\*\*  $p < 0.001$ .

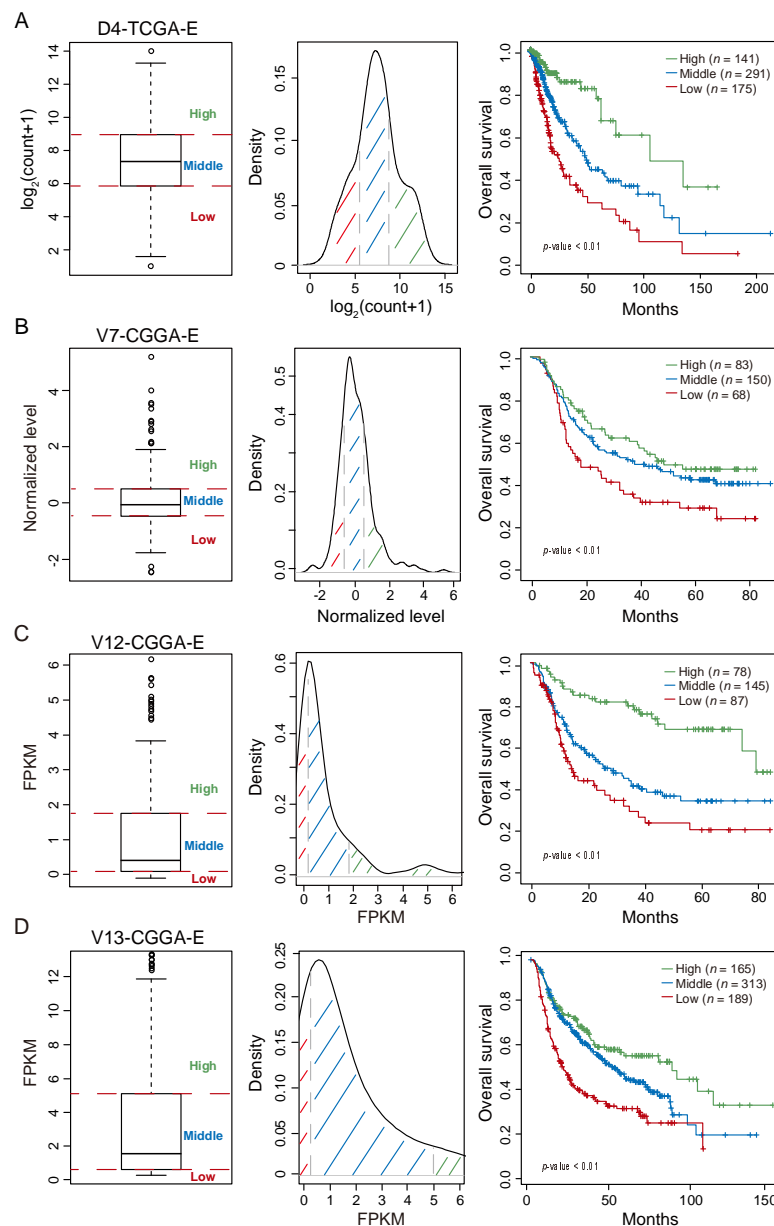

- 3
- 4 **Figure 4 *PRKCG* expression associated with survival.** Glioma patients were divided
- 5 into three groups based on the first and third quartile of *PRKCG* expression level in one
- 6 discovery dataset (D4-TCGA-E in panel A) and three validation datasets (V7-CGGA-E in
- 7 panel B, V12-CGGA-E in panel C, and V13-CGGA-E in panel D). All these datasets can

- 1 be publicly accessible at [ftp://download.big.ac.cn/glioma\\_data/](ftp://download.big.ac.cn/glioma_data/). The log-rank tests were
- 2 used to examine the statistical significance between different survival curves.

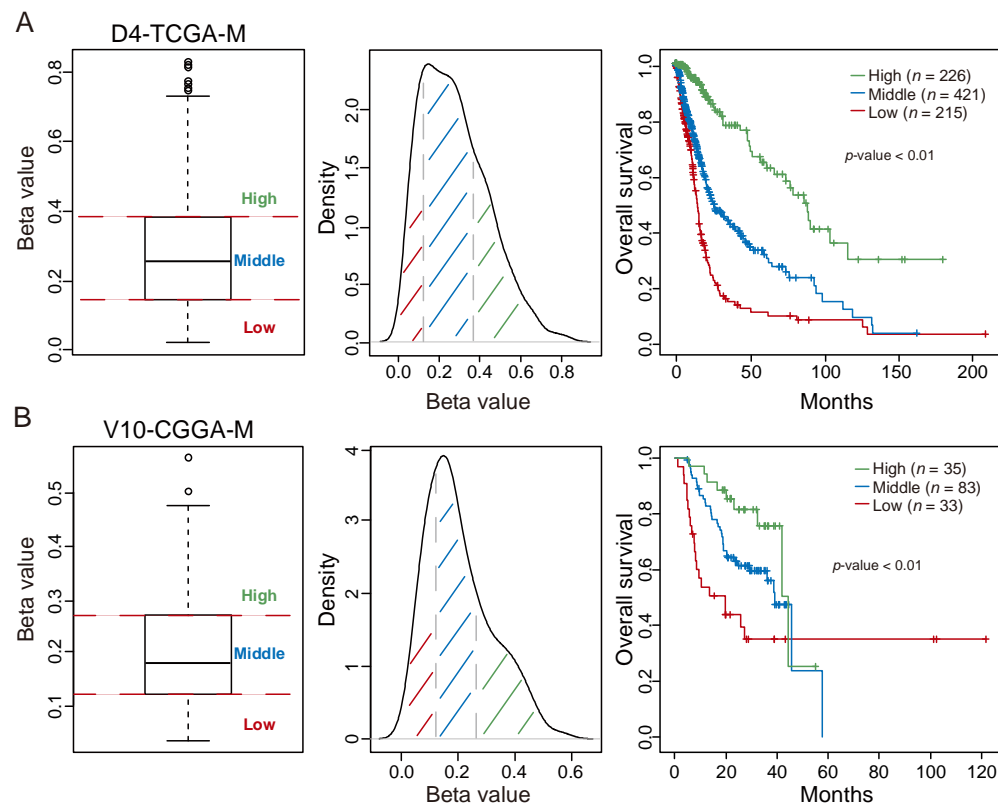

- 3
- 4 **Figure 5 *PRKCG* DNA methylation associated with survival.** Glioma patients were
- 5 divided into three groups based on the first and third quartile of *PRKCG* methylation
- 6 level in one discovery dataset (D4-TCGA-M in panel A) and one validation dataset (V10-
- 7 CGGA-M in panel B). All these datasets can be publicly accessible at
- 8 [ftp://download.big.ac.cn/glioma\\_data/](ftp://download.big.ac.cn/glioma_data/). The log-rank tests were used to examine the
- 9 statistical significance between different survival curves. See also Figure S6.

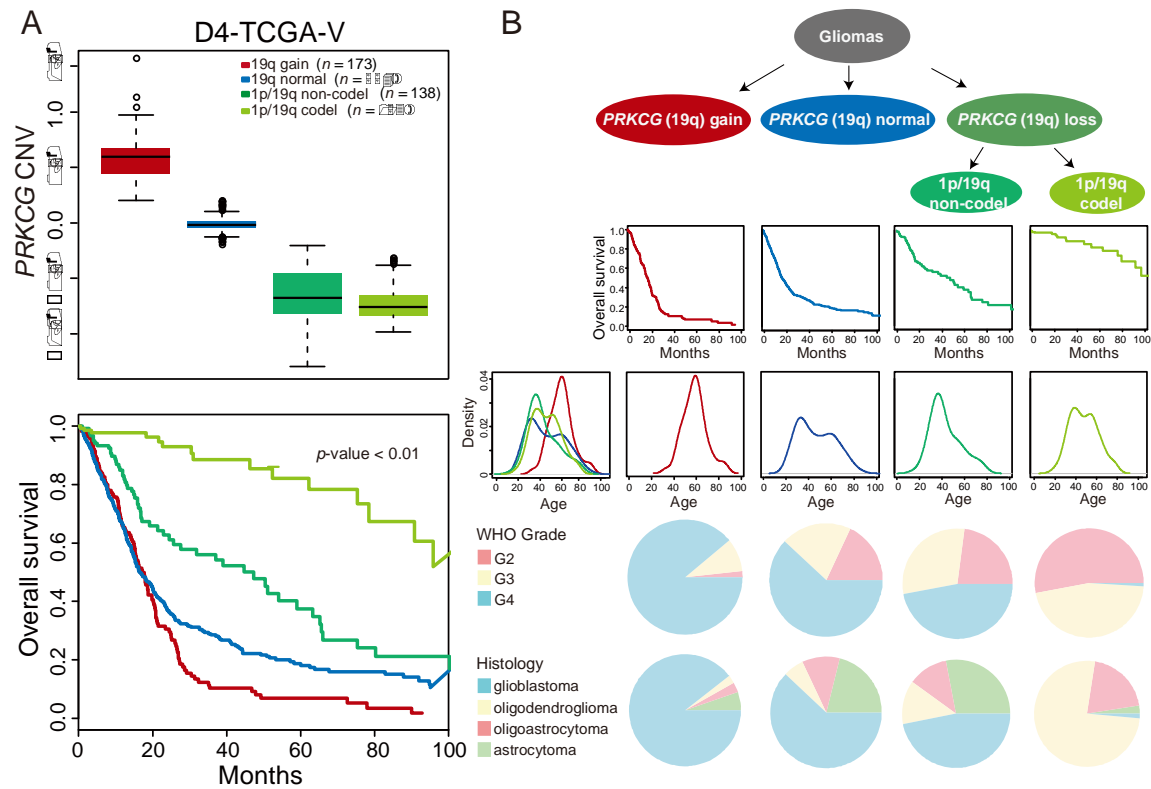

**Figure 6 PRKCG CNV associated with survival.** (A) Four groups of glioma patients were divided based on the 1p/19q status (19q gain, 19q normal, 1p/19q non-codel, and 1p/19q codel). (B) Kaplan-Meier survival probability, age, WHO grade and histology of the four groups.

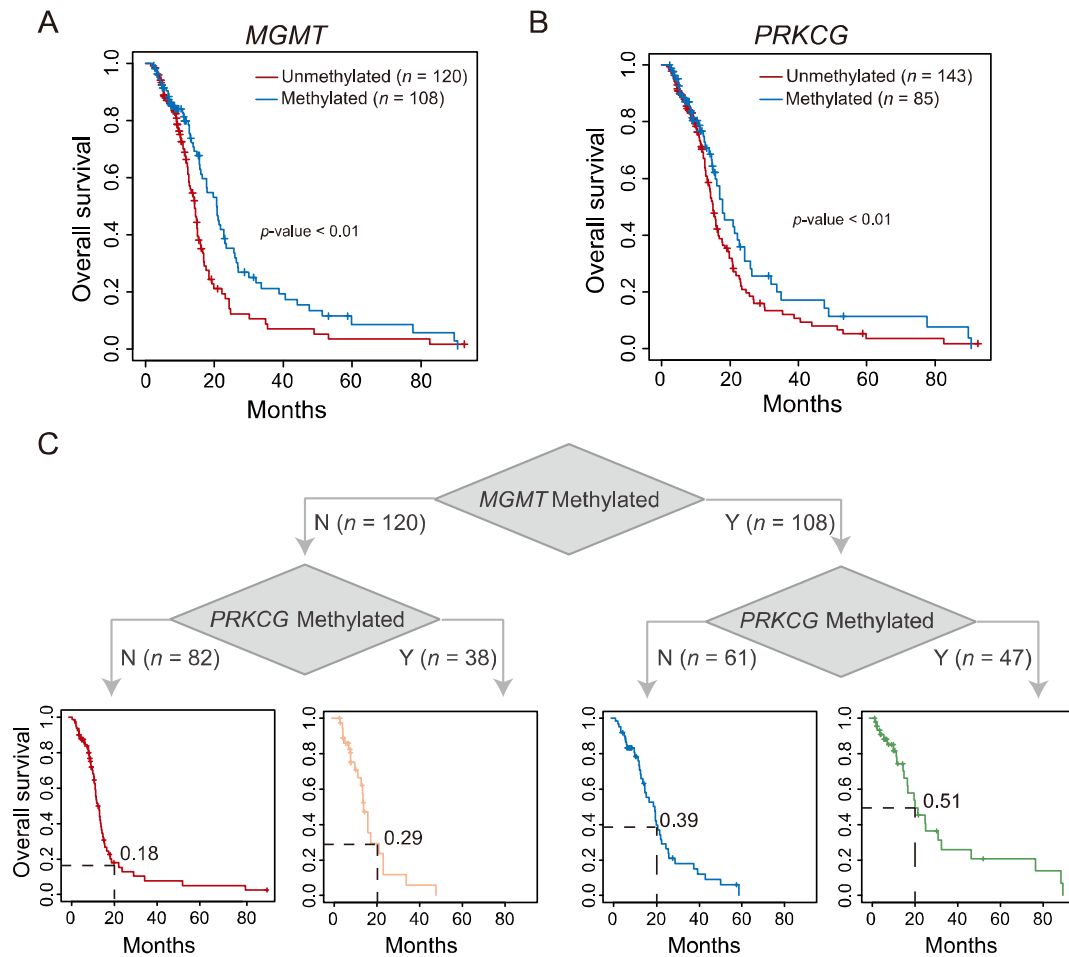

**Figure 7 Combined DNA methylation signatures of *MGMT* and *PRKCG* for treatment prediction.** (A) Kaplan-Meier survival curves for GBM patients with TMZ treatment based on *MGMT* methylation. (B) Kaplan-Meier survival curves for GBM patients with TMZ treatment based on *PRKCG* (cg26626089) methylation. (C) Kaplan-Meier survival curves for GBM patients with TMZ treatment based on *MGMT* and *PRKCG* combined methylation signatures. See also Figure S7.

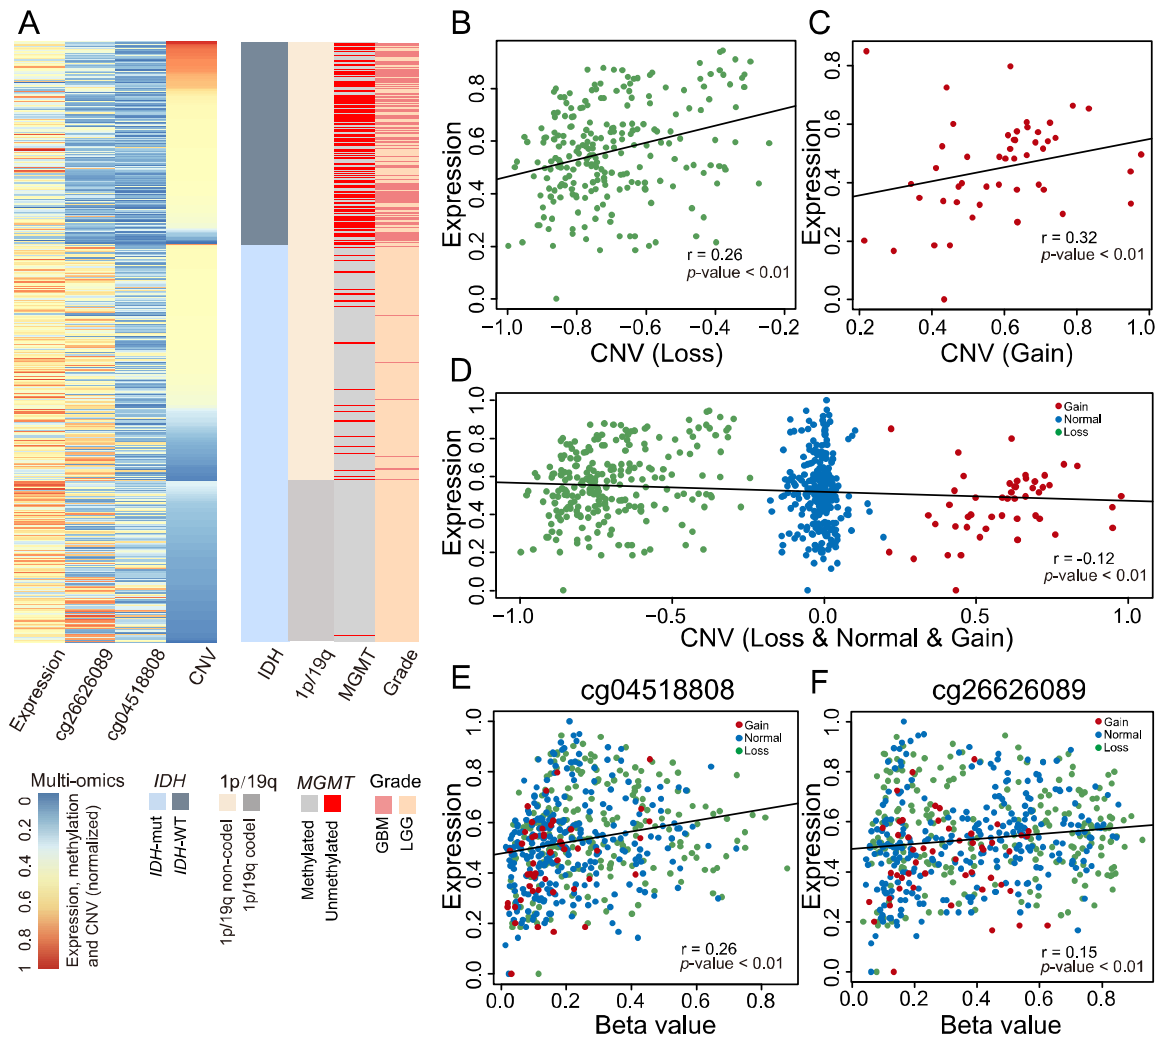

**Figure 8 Multi-omics molecular profiles of *PRKCG*.** (A) Association of *PRKCG*'s multi-omics signatures with *IDH*, 1p/19q status and WHO classification. (B) Correlation between *PRKCG* expression and CNV Loss. (C) Correlation between *PRKCG* expression and CNV Gain. (D) Correlation between *PRKCG* expression and all CNV status. (E) Correlation between *PRKCG* expression and DNA methylation of the CpG site cg04518808. (F) Correlation between *PRKCG* expression and DNA methylation of the CpG site cg26626089.

# 1 Tables

**Table 1. Summary of multi-omics multi-cohort glioma datasets**

| Category          | Accession number          | Source    | Omics type              | # Sample | # Population country/race | Reference                                  |
|-------------------|---------------------------|-----------|-------------------------|----------|---------------------------|--------------------------------------------|
| <b>Discovery</b>  | D1-GTEX-E                 | GTEX      | Expression (RNA-Seq)    | 11,688   | mostly white              | (John Lonsdale, 2013)                      |
|                   | D2-GSE83710-P             | GSE83710  | Protein                 | 133      | Japan                     | (Sasayama et al., 2017)                    |
|                   | D3-GSE16011-E             | GSE16011  | Expression (Microarray) | 284      | Netherlands               | (Gravendeel et al., 2009)                  |
|                   | D4-TCGA-V                 | TCGA      | CNV                     | 1,018    | mostly white              | (Ceccarelli et al., 2016)                  |
|                   | D4-TCGA-E                 |           | Expression (RNA-Seq)    | 607      |                           |                                            |
|                   | D4-TCGA-M                 |           | Methylation (27K+450K)  | 862      |                           |                                            |
|                   | D4-TCGA-M (TMZ treatment) |           | Methylation (27K+450K)  | 228      |                           |                                            |
|                   | D5-GSE36278-M             | GSE36278  | Methylation (450K)      | 142      | Germany                   | (Sturm et al., 2012)                       |
| <b>Validation</b> | V1-GSE4290-E              | GSE4290   | Expression (Microarray) | 180      | USA                       | (Sun et al., 2006)                         |
|                   | V2-GSE50161-E             | GSE50161  | Expression (Microarray) | 130      | USA                       | (Griesinger et al., 2013)                  |
|                   | V3-GSE59612-E             | GSE59612  | Expression (RNA-Seq)    | 92       | USA                       | (Gill et al., 2014)                        |
|                   | V4-GSE111260-E            | GSE111260 | Expression (Microarray) | 70       | Norway                    | -                                          |
|                   | V5-GSE2223-E              | GSE2223   | Expression (Microarray) | 54       | USA                       | (Bredel et al., 2006; Bredel et al., 2005) |
|                   | V6-Ivy GAP-E              | Ivy GAP   | Expression (RNA-Seq)    | 122      | unknown                   | (Puchalski et al., 2018)                   |
|                   | V7-CGGA-E                 | CGGA      | Expression (Microarray) | 301      | China                     | (Sun et al., 2014; Yan et al., 2012)       |
|                   | V8-GSE50923-M             | GEO       | Methylation (27K)       | 78       | USA                       | (Lai et al., 2014)                         |
|                   | V9-GSE61160-M             | GEO       | Methylation (450K)      | 51       | Spain                     | (Mur et al., 2013)                         |
|                   | V10-CGGA-M                | CGGA      | Methylation (27K)       | 159      | China                     | (Zhang et al., 2013)                       |
|                   | V11-TCGA-M                | TCGA      | Methylation (WGBS)      | 6        | white                     | -                                          |

|                |      |                      |     |             |                          |
|----------------|------|----------------------|-----|-------------|--------------------------|
| V12-CGGA-E     | CGGA | Expression (RNA-Seq) | 310 | China       | (Bao et al., 2014)       |
| V13-CGGA-E     | CGGA | Expression (RNA-Seq) | 667 | China       | -                        |
| V14-GSE60274-M | GEO  | Methylation (450K)   | 68  | Switzerland | (Kurscheid et al., 2015) |

---

- 1 Note:
- 2 CGGA: Chinese Glioma Genome Atlas, <http://www.cgga.org.cn>
- 3 GEO: Gene Expression Omnibus, <https://www.ncbi.nlm.nih.gov/geo/>
- 4 GTEx: Genotype-Tissue Expression, <https://www.gtexportal.org/>
- 5 TCGA: The Cancer Genome Atlas, <https://portal.gdc.cancer.gov>
- 6 Ivy GAP: Ivy Glioblastoma Atlas Project, <http://glioblastoma.alleninstitute.org/>

1 **Table 2. Univariate and multivariate Cox regression analyses for *PRKCG***

| Subgroup                                  | Univariate |           |            | Multivariate |           |            |
|-------------------------------------------|------------|-----------|------------|--------------|-----------|------------|
|                                           | HR         | 95% CI    | P-value    | HR           | 95% CI    | P-value    |
| <b>D4-TCGA-E (n = 607)</b>                |            |           |            |              |           |            |
| <i>PRKCG</i> -expression                  | 0.48       | 0.38-0.61 | $p < 0.01$ | 0.58         | 0.45-0.73 | $p < 0.01$ |
| Age                                       | 1.07       | 1.06-1.09 | $p < 0.01$ | 1.07         | 1.06-1.08 | $p < 0.01$ |
| Gender                                    | 1.01       | 0.75-1.36 | $p = 0.9$  | 0.87         | 0.64-1.17 | $p = 0.37$ |
| <b>V7-CGGA-E (n = 301)</b>                |            |           |            |              |           |            |
| <i>PRKCG</i> -expression                  | 0.73       | 0.60-0.88 | $p < 0.01$ | 0.81         | 0.66-0.98 | $p = 0.03$ |
| Age                                       | 1.04       | 1.03-1.06 | $p < 0.01$ | 1.04         | 1.02-1.05 | $p < 0.01$ |
| Gender                                    | 0.83       | 0.61-1.15 | $p = 0.27$ | 0.87         | 0.63-1.20 | $p = 0.39$ |
| <b>V12-CGGA-E (n = 310)</b>               |            |           |            |              |           |            |
| <i>PRKCG</i> -expression                  | 0.59       | 0.41-0.86 | $p < 0.01$ | 0.59         | 0.40-0.86 | $p < 0.01$ |
| Age                                       | 1.04       | 1.02-1.05 | $p < 0.01$ | 1.05         | 1.02-1.07 | $p < 0.01$ |
| Gender                                    | 0.85       | 0.60-1.19 | $p = 0.35$ | 0.71         | 0.39-1.28 | $p = 0.26$ |
| <b>V13-CGGA-E (n = 667)</b>               |            |           |            |              |           |            |
| <i>PRKCG</i> -expression                  | 0.64       | 0.5-0.74  | $p < 0.01$ | 0.63         | 0.54-0.74 | $p < 0.01$ |
| Age                                       | 1.03       | 1.02-1.04 | $p < 0.01$ | 1.03         | 1.02-1.04 | $p < 0.01$ |
| Gender                                    | 1.03       | 0.83-1.27 | $p = 0.82$ | 1.07         | 0.86-1.32 | $p = 0.57$ |
| <b>D4-TCGA-M (n = 862)</b>                |            |           |            |              |           |            |
| <i>PRKCG</i> -methylation                 | 0.45       | 0.39-0.52 | $p < 0.01$ | 0.57         | 0.48-0.66 | $p < 0.01$ |
| Age                                       | 1.07       | 1.06-1.08 | $p < 0.01$ | 1.06         | 1.05-1.07 | $p < 0.01$ |
| Gender                                    | 1.15       | 0.93-1.45 | $p = 0.21$ | 1.23         | 0.99-1.52 | $p = 0.06$ |
| <b>D4-TCGA-M (TMZ treatment; n = 228)</b> |            |           |            |              |           |            |
| <i>PRKCG</i> -methylation                 | 0.69       | 0.49-0.98 | $p = 0.04$ | 0.67         | 0.47-0.95 | $p = 0.03$ |
| <i>MGMT</i>                               | 0.61       | 0.44-0.86 | $p < 0.01$ | 0.66         | 0.47-0.94 | $p = 0.02$ |
| Age                                       | 1.03       | 1.02-1.05 | $p < 0.01$ | 1.03         | 1.02-1.05 | $p < 0.01$ |
| Gender                                    | 0.76       | 0.54-1.07 | $p = 0.11$ | 0.73         | 0.51-1.03 | $p = 0.07$ |
| <b>V10-CCGA-M (n = 159)</b>               |            |           |            |              |           |            |
| <i>PRKCG</i> -methylation                 | 0.53       | 0.36-0.77 | $p < 0.01$ | 0.50         | 0.34-0.73 | $p < 0.01$ |
| Age                                       | 1.04       | 1.02-1.05 | $p < 0.01$ | 1.04         | 1.02-1.06 | $p < 0.01$ |
| Gender                                    | 1.23       | 0.75-2.02 | $p = 0.42$ | 1.52         | 0.91-2.53 | $p = 0.11$ |

Note: HR=Hazard

Ratio

# 1 Supplemental Information

2

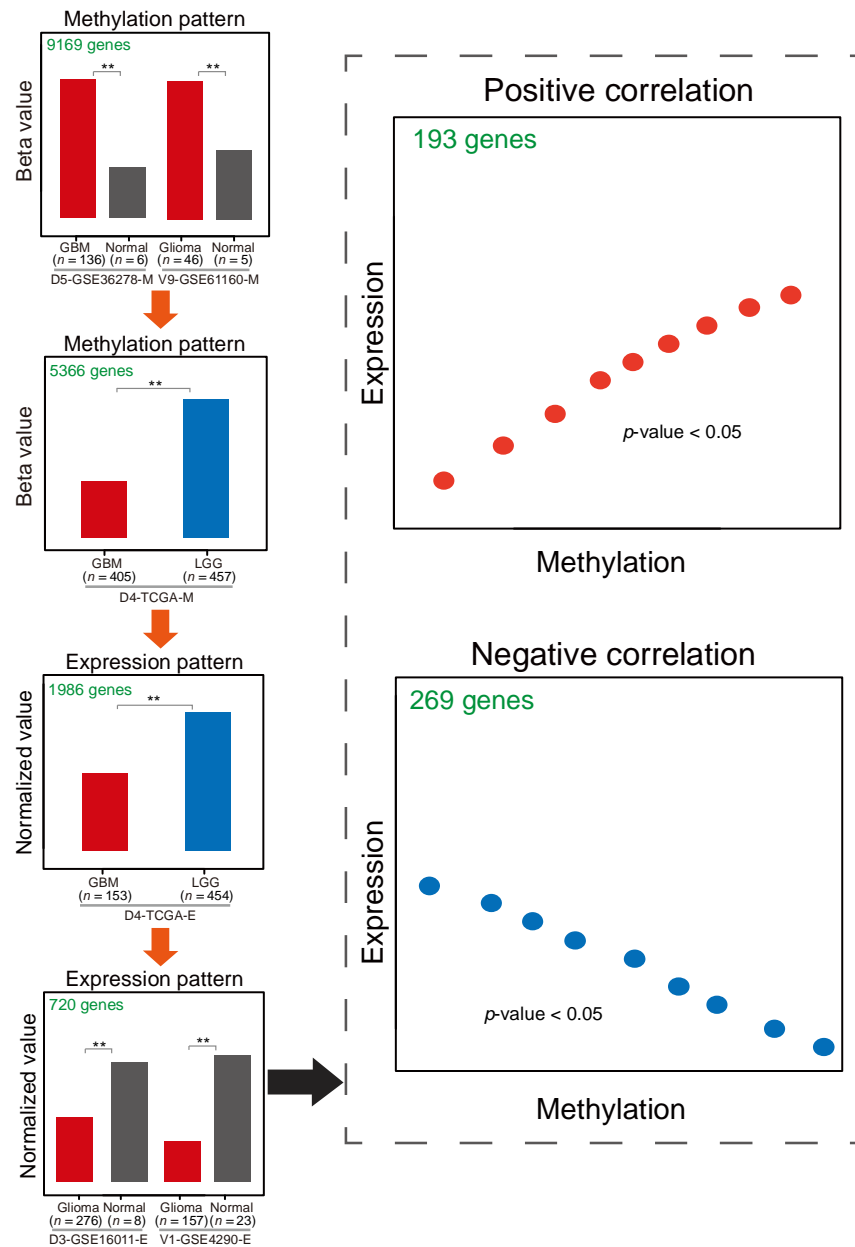

3

4 **Figure S1 Workflow for identification of *PRKCG*-like genes.** Four steps were adopted

5 to detect *PRKCG*-like genes in glioma. As a result, there are 193 and 269 genes that

1 present positive and negative correlation between expression and methylation,  
2 respectively.

3

4

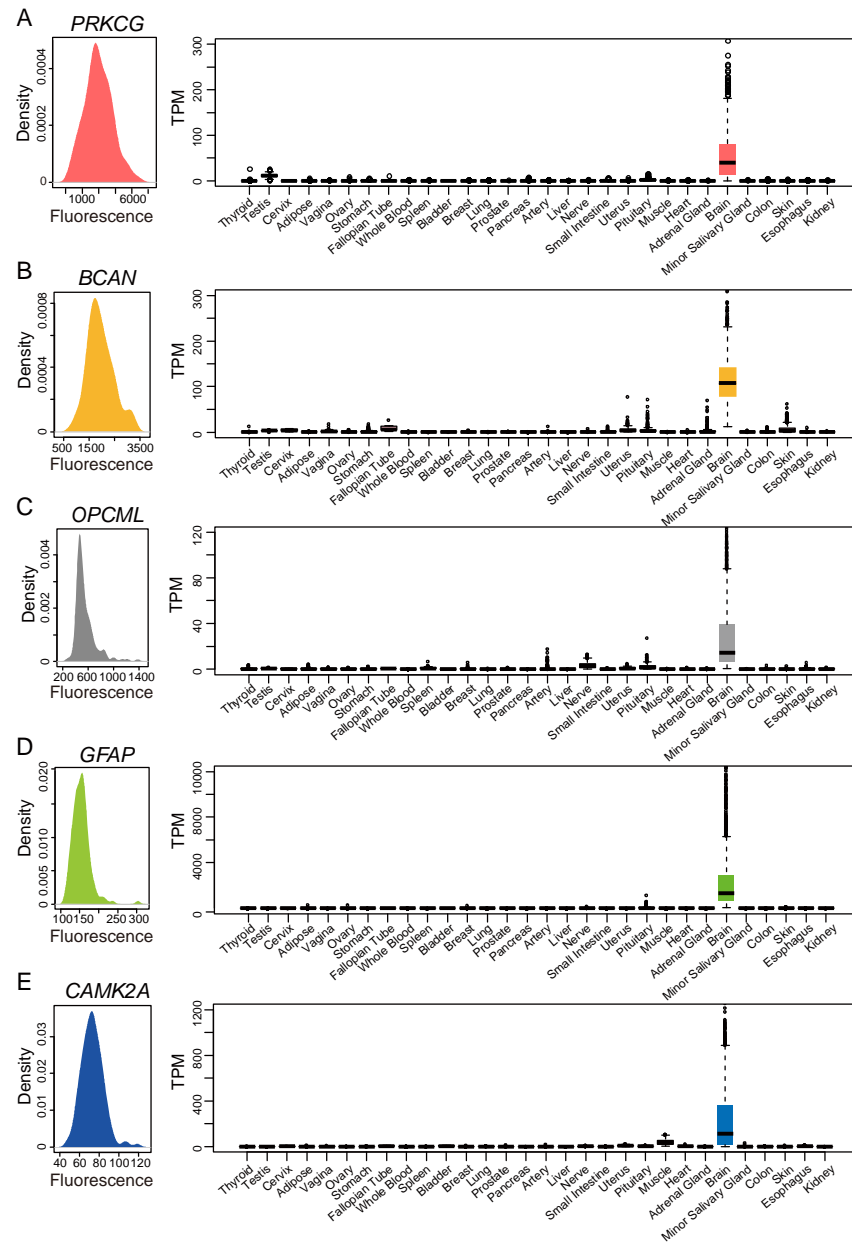

5

1 **Figure S2 Protein level distributions in CSF and RNA expression profiles of *PRKCG***  
2 **(A), *BCAN* (B), *OPCML* (C), *GFAP* (D), *CAMK2A* (E) across 30 normal human**  
3 **tissues. Related to Figure 1.**

4

5

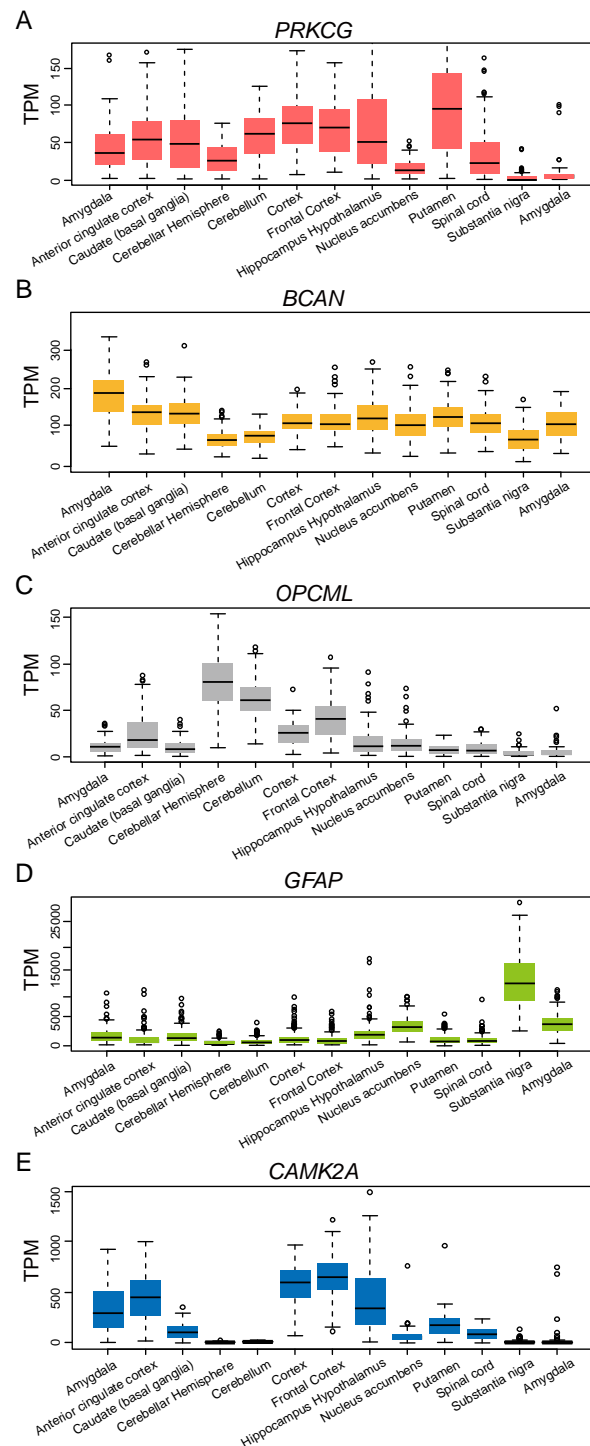

1

2 **Figure S3 Expression profiles of *PRKCG* (A), *BCAN* (B), *OPCML* (C), *GFAP* (D),**  
 3 **and *CAMK2A* (E) across 13 human brain regions. Related to Figure 1.**

1

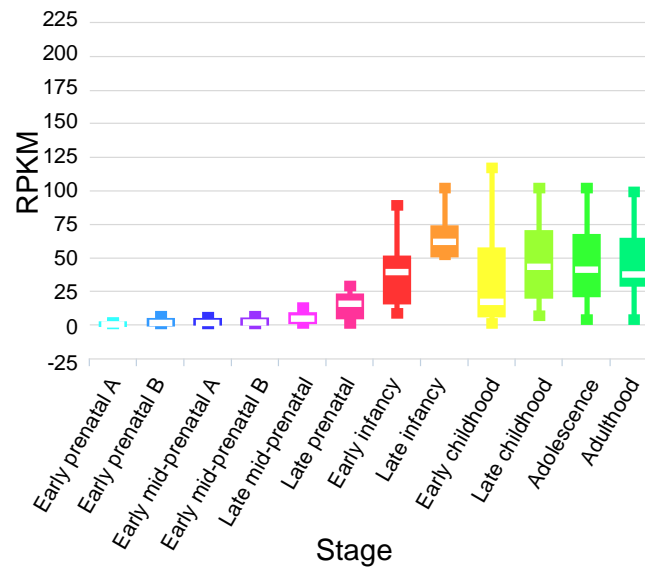

2

3 **Figure S4 Expression profiles of *PRKCG* during brain development.**

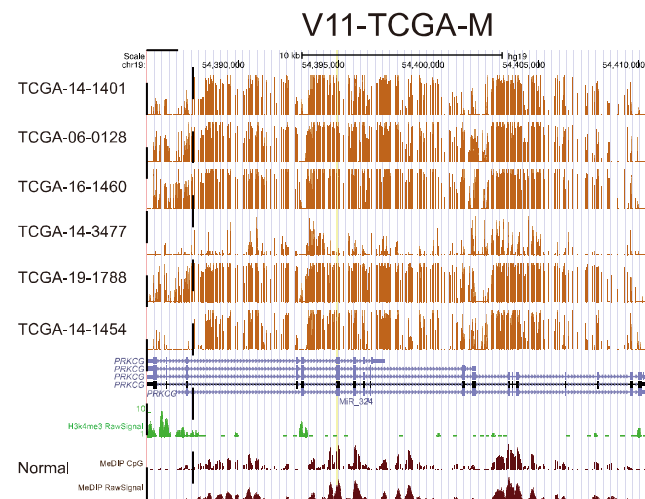

4

5 **Figure S5 Bisulfite DNA methylation profiles of *PRKCG* across six GBM samples**  
6 **and one normal sample. Related to Figure 3.**

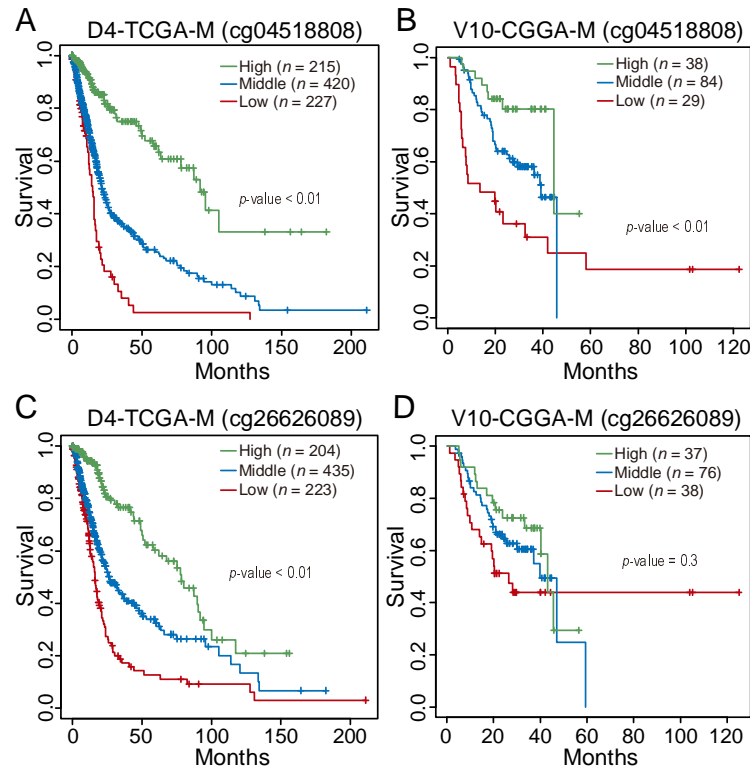

1

2 **Figure S6 Prognostic potential of *PRKCG* DNA methylation.** Glioma patients were  
3 divided into three groups based on the first and third quartile of cg04518808/cg26626089  
4 methylation in discovery dataset (D4-TCGA-M in panel A/C) and validation dataset  
5 (V10-CGGA-M in panel B/D). All these datasets can be publicly accessible at  
6 [ftp://download.big.ac.cn/glioma\\_data/](ftp://download.big.ac.cn/glioma_data/). The log-rank tests were used to examine the  
7 statistical significance between different survival curves.

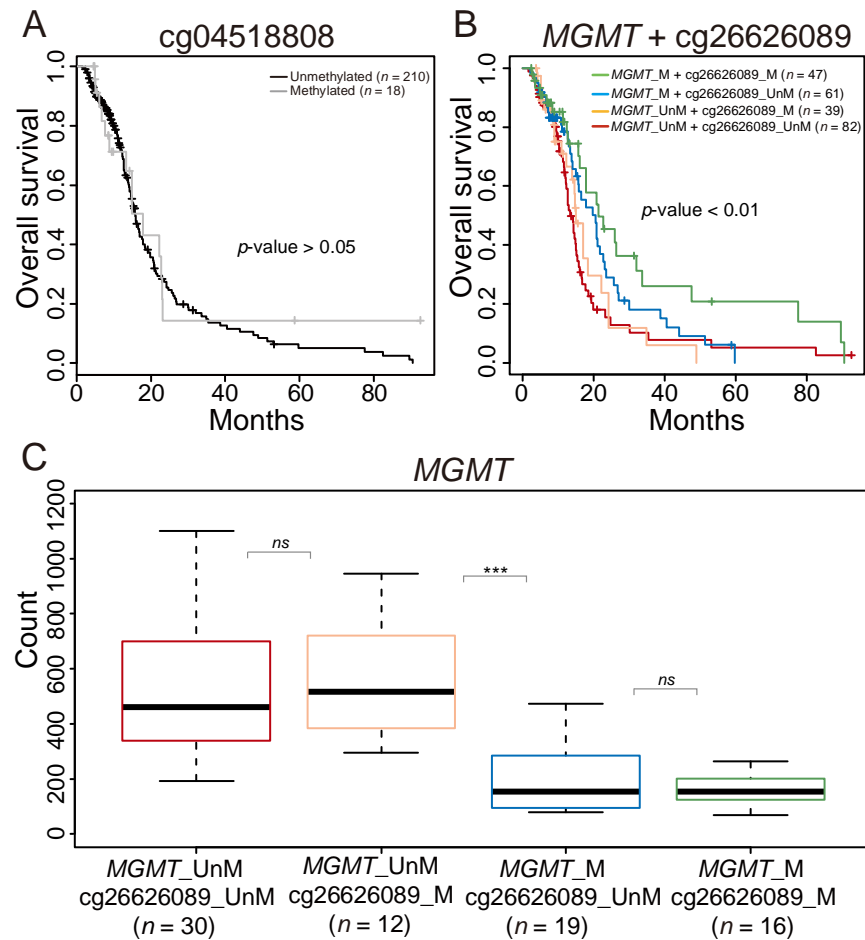

1

2 **Figure S7 Predictive potential of *PRKCG* DNA methylation.** (A) Kaplan-Meier  
3 survival curves for GBM patients with TMZ treatment based on *PRKCG* (cg04518808)  
4 methylation. (B) Methylation site cg26626089 in combination with *MGMT*, which were  
5 used to classify GBM patients into four groups. (C) Expression profiles of *MGMT* in the  
6 four groups.

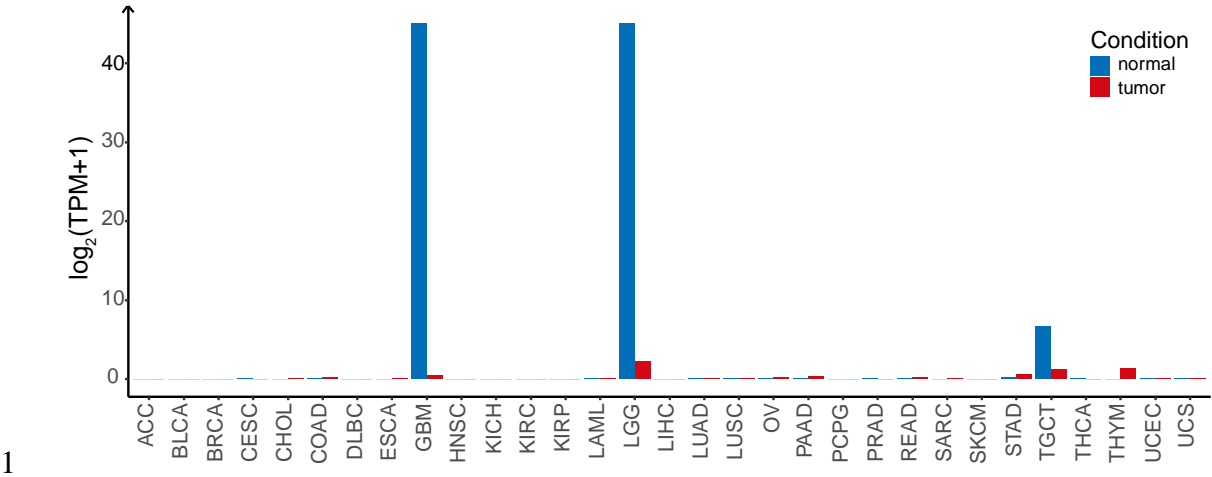

2 **Figure S8 Expression profiles of *PRKCG* across 31 human tumor and normal tissues.**

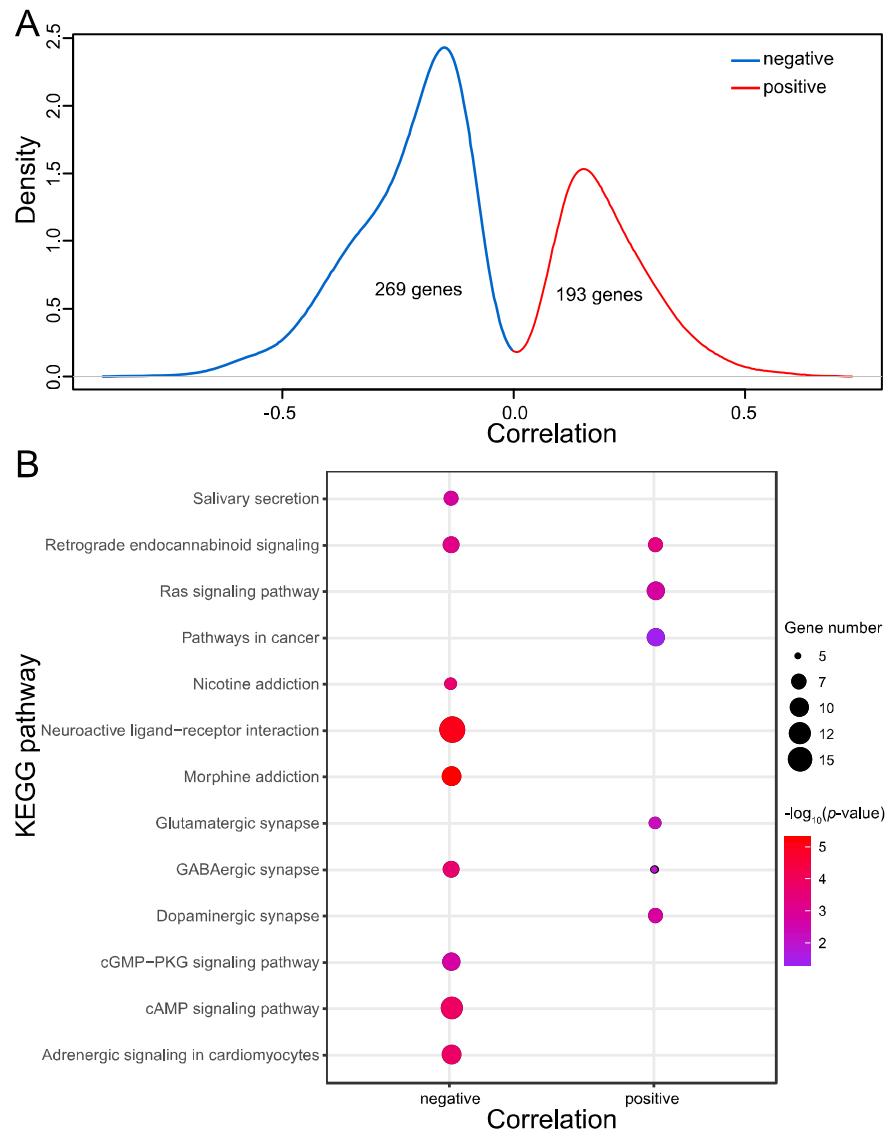

1

2 **Figure S9 Comparative analysis of two groups' genes that present positive and**  
 3 **negative correlations between gene expression and methylation, respectively. (A) The**  
 4 **density plot of the Spearman correlation. (B) The KEGG pathway enrichment.**

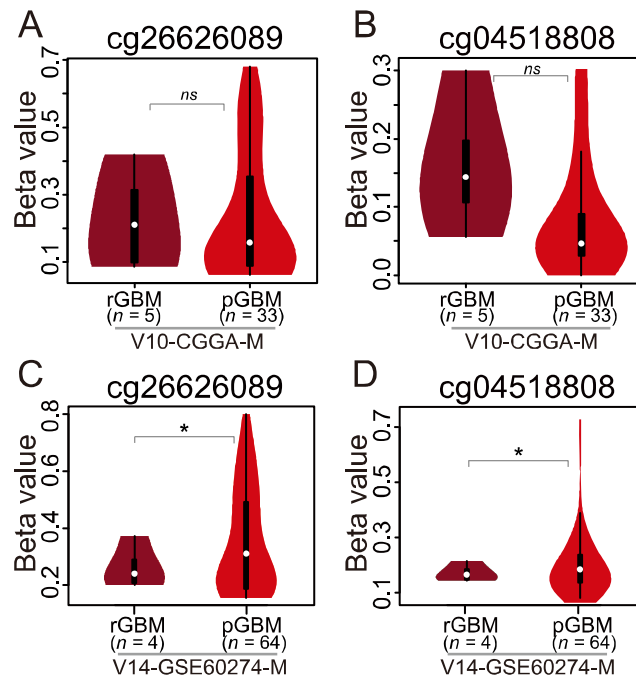

1

2 **Figure S10 DNA methylation profiles of *PRKCG* in recurrent GBM (rGBM) and**  
3 **primary GBM (pGBM) samples.** *PRKCG* methylation profiles were compared between  
4 rGBM and pGBM samples (V10-CGGA-M in panels A and B and V14-GSE60274-M in  
5 panels C and D). All these datasets can be publicly accessible at  
6 [ftp://download.big.ac.cn/glioma\\_data/](ftp://download.big.ac.cn/glioma_data/). The Wilcoxon tests were used and the statistical  
7 significance levels were coded by: ns  $p > 0.05$ , \*  $p < 0.05$ , \*\*  $p < 0.01$  and \*\*\*  $p < 0.001$ .

8

9 **Table S1** 15,176 genes' RNA expression levels across 30 normal human tissues.

10

11 **Table S2**  $\tau$  values and maximum expression levels of the 100 brain-specific protein-  
12 coding genes.

1

2 **Table S3** Gene Ontology categories of genes co-expressed with *PRKCG*.

3

4 **Table S4** Spearman correlation between gene expression and CpG site methylation  
5 (*PRKCG*-like genes).

6

## 7 **References**

- 8 A.Maher., E., B.Furnari., F., M.Bachoo., R., H.rowitch., D., N.Louis., D., Cavenee., W.  
9 K., and A.DePinho, R. (2019). Malignant glioma:genetics and biology of a grave matter.  
10 GENES & DEVELOPMENT 15, 1311-1333.
- 11 Bao, Z. S., Chen, H. M., Yang, M. Y., Zhang, C. B., Yu, K., Ye, W. L., Hu, B. Q., Yan, W.,  
12 Zhang, W., Akers, J., *et al.* (2014). RNA-seq of 272 gliomas revealed a novel, recurrent  
13 PTPRZ1-MET fusion transcript in secondary glioblastomas. Genome Res 24, 1765-1773.
- 14 Baylin, S. B. (2005). DNA methylation and gene silencing in cancer. Nat Clin Pract  
15 Oncol 2 Suppl 1, S4-11.
- 16 Binabaj, M. M., Bahrami, A., ShahidSales, S., Joodi, M., Joudi Mashhad, M., Hassanian,  
17 S. M., Anvari, K., and Avan, A. (2018). The prognostic value of MGMT promoter  
18 methylation in glioblastoma: A meta-analysis of clinical trials. J Cell Physiol 233, 378-  
19 386.
- 20 Bredel, M., Bredel, C., Juric, D., Duran, G. E., Yu, R. X., Harsh, G. R., Vogel, H., Recht,  
21 L. D., Scheck, A. C., and Sikic, B. I. (2006). Tumor necrosis factor-alpha-induced protein  
22 3 as a putative regulator of nuclear factor-kappaB-mediated resistance to O6-alkylating  
23 agents in human glioblastomas. J Clin Oncol 24, 274-287.
- 24 Bredel, M., Bredel, C., Juric, D., Harsh, G. R., Vogel, H., Recht, L. D., and Sikic, B. I.  
25 (2005). Functional network analysis reveals extended gliomagenesis pathway maps and  
26 three novel MYC-interacting genes in human gliomas. Cancer Res 65, 8679-8689.
- 27 Cairncross, G., Wang, M., Shaw, E., Jenkins, R., Brachman, D., Buckner, J., Fink, K.,  
28 Souhami, L., Laperriere, N., Curran, W., and Mehta, M. (2013). Phase III trial of  
29 chemoradiotherapy for anaplastic oligodendroglioma: long-term results of RTOG 9402. J  
30 Clin Oncol 31, 337-343.

- 1 Cancer Genome Atlas Research, N., Brat, D. J., Verhaak, R. G., Aldape, K. D., Yung, W.  
2 K., Salama, S. R., Cooper, L. A., Rheinbay, E., Miller, C. R., Vitucci, M., *et al.* (2015).  
3 Comprehensive, Integrative Genomic Analysis of Diffuse Lower-Grade Gliomas. *N Engl*  
4 *J Med* 372, 2481-2498.
- 5 Carminati, P. O., Mello, S. S., Fachin, A. L., Junta, C. M., Sandrin-Garcia, P., Carlotti,  
6 C. G., Donadi, E. A., Passos, G. A. S., and Sakamoto-Hojo, E. T. (2010). Alterations in  
7 gene expression profiles correlated with cisplatin cytotoxicity in the glioma U343 cell  
8 line. *Genetics and molecular biology* 33, 159-168.
- 9 Catriona M. Dowling, S. L. H., James J. Phelan, Mary Clare Cathcart, Stephen P. Finn,  
10 Brian Mehigan, Paul McCormick, John C. Coffey, Jacintha, and Kiely, O. S. a. P. A.  
11 (2017). Expression of protein kinase C gamma promotes cell migration in colon cancer.  
12 *Oncotarget* 8, 72096-72107.
- 13 Ceccarelli, M., Barthel, F. P., Malta, T. M., Sabedot, T. S., Salama, S. R., Murray, B. A.,  
14 Morozova, O., Newton, Y., Radenbaugh, A., Pagnotta, S. M., *et al.* (2016). Molecular  
15 Profiling Reveals Biologically Discrete Subsets and Pathways of Progression in Diffuse  
16 Glioma. *Cell* 164, 550-563.
- 17 Christensen, B. C., Smith, A. A., Zheng, S., Koestler, D. C., Houseman, E. A., Marsit, C.  
18 J., Wiemels, J. L., Nelson, H. H., Karagas, M. R., Wensch, M. R., *et al.* (2011). DNA  
19 methylation, isocitrate dehydrogenase mutation, and survival in glioma. *J Natl Cancer*  
20 *Inst* 103, 143-153.
- 21 Cohen, A. L., Holmen, S. L., and Colman, H. (2013). IDH1 and IDH2 mutations in  
22 gliomas. *Curr Neurol Neurosci Rep* 13, 345.
- 23 Cook, P. J., Thomas, R., Kannan, R., de Leon, E. S., Drilon, A., Rosenblum, M. K.,  
24 Scaltriti, M., Benezra, R., and Ventura, A. (2018). Author Correction: Somatic  
25 chromosomal engineering identifies BCAN-NTRK1 as a potent glioma driver and  
26 therapeutic target. *Nat Commun* 9, 16187.
- 27 Dang, L., Jin, S., and Su, S. M. (2010). IDH mutations in glioma and acute myeloid  
28 leukemia. *Trends Mol Med* 16, 387-397.
- 29 Dang, L., Yen, K., and Attar, E. C. (2016). IDH mutations in cancer and progress toward  
30 development of targeted therapeutics. *Ann Oncol* 27, 599-608.
- 31 do Carmo, A., Balca-Silva, J., Matias, D., and Lopes, M. C. (2013). PKC signaling in  
32 glioblastoma. *Cancer Biol Ther* 14, 287-294.
- 33 Donson, A. M., Addo-Yobo, S. O., Handler, M. H., Gore, L., and Foreman, N. K. (2007).  
34 MGMT promoter methylation correlates with survival benefit and sensitivity to  
35 temozolomide in pediatric glioblastoma. *Pediatr Blood Cancer* 48, 403-407.

- 1 Eckel-Passow, J. E., Lachance, D. H., Molinaro, A. M., Walsh, K. M., Decker, P. A.,  
2 Sicotte, H., Pekmezci, M., Rice, T., Kosel, M. L., Smirnov, I. V., *et al.* (2015). Glioma  
3 Groups Based on 1p/19q, IDH, and TERT Promoter Mutations in Tumors. *N Engl J Med*  
4 372, 2499-2508.
- 5 Esteller, M. (2007). Cancer epigenomics: DNA methylomes and histone-modification  
6 maps. *Nat Rev Genet* 8, 286-298.
- 7 Fan, Q. W., Cheng, C., Knight, Z. A., Haas-Kogan, D., Stokoe, D., James, C. D.,  
8 McCormick, F., Shokat, K. M., and Weiss, W. A. (2009). EGFR signals to mTOR through  
9 PKC and independently of Akt in glioma. *Sci Signal* 2, ra4.
- 10 Flynn, J. R., Wang, L., Gillespie, D. L., Stoddard, G. J., Reid, J. K., Owens, J., Ellsworth,  
11 G. B., Salzman, K. L., Kinney, A. Y., and Jensen, R. L. (2008). Hypoxia-regulated protein  
12 expression, patient characteristics, and preoperative imaging as predictors of survival in  
13 adults with glioblastoma multiforme. *Cancer* 113, 1032-1042.
- 14 Fukushima, T., Takeshima, H., and Kataoka, H. (2009). Anti-glioma therapy with  
15 temozolomide and status of the DNA-repair gene MGMT. *Anticancer Res* 29, 4845-4854.
- 16 Gill, B. J., Pisapia, D. J., Malone, H. R., Goldstein, H., Lei, L., Sonabend, A., Yun, J.,  
17 Samanamud, J., Sims, J. S., Banu, M., *et al.* (2014). MRI-localized biopsies reveal  
18 subtype-specific differences in molecular and cellular composition at the margins of  
19 glioblastoma. *Proc Natl Acad Sci U S A* 111, 12550-12555.
- 20 Gravendeel, L. A., Kouwenhoven, M. C., Gevaert, O., de Rooi, J. J., Stubbs, A. P., Duijm,  
21 J. E., Daemen, A., Bleeker, F. E., Bralten, L. B., Kloosterhof, N. K., *et al.* (2009).  
22 Intrinsic gene expression profiles of gliomas are a better predictor of survival than  
23 histology. *Cancer Res* 69, 9065-9072.
- 24 Griesinger, A. M., Birks, D. K., Donson, A. M., Amani, V., Hoffman, L. M., Waziri, A.,  
25 Wang, M., Handler, M. H., and Foreman, N. K. (2013). Characterization of distinct  
26 immunophenotypes across pediatric brain tumor types. *J Immunol* 191, 4880-4888.
- 27 Guo, C., Pirozzi, C. J., Lopez, G. Y., and Yan, H. (2011). Isocitrate dehydrogenase  
28 mutations in gliomas: mechanisms, biomarkers and therapeutic target. *Curr Opin Neurol*  
29 24, 648-652.
- 30 Hegi, M. E., Diserens, A. C., Gorlia, T., Hamou, M. F., de Tribolet, N., Weller, M., Kros,  
31 J. M., Hainfellner, J. A., Mason, W., Mariani, L., *et al.* (2005). MGMT gene silencing and  
32 benefit from temozolomide in glioblastoma. *N Engl J Med* 352, 997-1003.
- 33 Henrichsen, C. N., Chaignat, E., and Reymond, A. (2009). Copy number variants,  
34 diseases and gene expression. *Hum Mol Genet* 18, R1-8.
- 35 Herman, J. G., and Baylin, S. B. (2003). Gene Silencing in Cancer in Association with  
36 Promoter Hypermethylation. *New England Journal of Medicine* 349, 2042-2054.

- 1 Horst, M., Brouwer, E., Verwijnen, S., Rodijk, M., de Jong, M., Hoeben, R., de Leeuw,  
2 B., and Smitt, P. S. (2007). Targeting malignant gliomas with a glial fibrillary acidic  
3 protein (GFAP)-selective oncolytic adenovirus. *J Gene Med* 9, 1071-1079.
- 4 Hu, H., Mu, Q., Bao, Z., Chen, Y., Liu, Y., Chen, J., Wang, K., Wang, Z., Nam, Y., Jiang,  
5 B., *et al.* (2018). Mutational Landscape of Secondary Glioblastoma Guides MET-  
6 Targeted Trial in Brain Tumor. *Cell* 175, 1665-1678 e1618.
- 7 Hu, L., Li, X., Liu, Q., Xu, J., Ge, H., Wang, Z., Wang, H., Wang, Z., Shi, C., Xu, X., *et*  
8 *al.* (2017). UBE2S, a novel substrate of Akt1, associates with Ku70 and regulates DNA  
9 repair and glioblastoma multiforme resistance to chemotherapy. *Oncogene* 36, 1145-  
10 1156.
- 11 Ichimura, K., Pearson, D. M., Kocialkowski, S., Backlund, L. M., Chan, R., Jones, D. T.,  
12 and Collins, V. P. (2009). IDH1 mutations are present in the majority of common adult  
13 gliomas but rare in primary glioblastomas. *Neuro Oncol* 11, 341-347.
- 14 Jenkins, R. B., Blair, H., Ballman, K. V., Giannini, C., Arusell, R. M., Law, M., Flynn, H.,  
15 Passe, S., Felten, S., Brown, P. D., *et al.* (2006). A t(1;19)(q10;p10) mediates the  
16 combined deletions of 1p and 19q and predicts a better prognosis of patients with  
17 oligodendroglioma. *Cancer Res* 66, 9852-9861.
- 18 John CG Spainhour, H. S. L., Soojin V Yi and Peng Qiu (2019). Correlation Patterns  
19 Between DNA Methylation and Gene Expression in The Cancer Genome Atlas. *Cancer*  
20 *Informatics* 18, 1176935119828776.
- 21 John Lonsdale, J. T., Mike Salvatore, Rebecca Phillips (2013). The Genotype-Tissue  
22 Expression (GTEx) project. *Nat Genet* 45, 580-585.
- 23 John, S., Sivakumar, K. C., and Mishra, R. (2017). Bacoside A Induces Tumor Cell Death  
24 in Human Glioblastoma Cell Lines through Catastrophic Macropinocytosis. *Front Mol*  
25 *Neurosci* 10, 171.
- 26 Jung, E., Osswald, M., Blaes, J., Wiestler, B., Sahm, F., Schmenger, T., Solecki, G.,  
27 Deumelandt, K., Kurz, F. T., Xie, R., *et al.* (2017). Tweety-Homolog 1 Drives Brain  
28 Colonization of Gliomas. *J Neurosci* 37, 6837-6850.
- 29 Kerr, D. A., Lopez, H. U., Deshpande, V., Hornicek, F. J., Duan, Z., Zhang, Y.,  
30 Rosenberg, A. E., Borger, D. R., and Nielsen, G. P. (2013). Molecular distinction of  
31 chondrosarcoma from chondroblastic osteosarcoma through IDH1/2 mutations. *Am J*  
32 *Surg Pathol* 37, 787-795.
- 33 Kim, Y. W., Koul, D., Kim, S. H., Lucio-Eterovic, A. K., Freire, P. R., Yao, J., Wang, J.,  
34 Almeida, J. S., Aldape, K., and Yung, W. K. (2013). Identification of prognostic gene  
35 signatures of glioblastoma: a study based on TCGA data analysis. *Neuro-oncology* 15,  
36 829-839.

- 1 Klebe, S., Durr, A., Rentschler, A., Hahn-Barma, V., Abele, M., Bouslam, N., Schols, L.,  
2 Jedynek, P., Forlani, S., Denis, E., *et al.* (2005). New mutations in protein kinase  
3 Cgamma associated with spinocerebellar ataxia type 14. *Ann Neurol* 58, 720-729.
- 4 Kloosterhof, N. K., Bralten, L. B. C., Dubbink, H. J., French, P. J., and van den Bent, M.  
5 J. (2011). Isocitrate dehydrogenase-1 mutations: a fundamentally new understanding of  
6 diffuse glioma? *The Lancet Oncology* 12, 83-91.
- 7 Kurscheid, S., Bady, P., Sciuscio, D., Samarzija, I., Shay, T., Vassallo, I., Crieckinge, W.  
8 V., Daniel, R. T., van den Bent, M. J., Marosi, C., *et al.* (2015). Chromosome 7 gain and  
9 DNA hypermethylation at the HOXA10 locus are associated with expression of a stem  
10 cell related HOX-signature in glioblastoma. *Genome Biol* 16, 16.
- 11 La Thangue, N. B., and Kerr, D. J. (2011). Predictive biomarkers: a paradigm shift  
12 towards personalized cancer medicine. *Nat Rev Clin Oncol* 8, 587-596.
- 13 Lai, R. K., Chen, Y., Guan, X., Nousome, D., Sharma, C., Canoll, P., Bruce, J., Sloan, A.  
14 E., Cortes, E., Vonsattel, J. P., *et al.* (2014). Genome-wide methylation analyses in  
15 glioblastoma multiforme. *PLoS One* 9, e89376.
- 16 Li, Y. H., Yu, C. Y., Li, X. X., Zhang, P., Tang, J., Yang, Q., Fu, T., Zhang, X., Cui, X., Tu,  
17 G., *et al.* (2018). Therapeutic target database update 2018: enriched resource for  
18 facilitating bench-to-clinic research of targeted therapeutics. *Nucleic Acids Res* 46,  
19 D1121-D1127.
- 20 Long, H., Liang, C., Zhang, X., Fang, L., Wang, G., Qi, S., Huo, H., and Song, Y. (2017).  
21 Prediction and Analysis of Key Genes in Glioblastoma Based on Bioinformatics. *Biomed*  
22 *Res Int* 2017, 7653101.
- 23 Louis, D. N., Ohgaki, H., Wiestler, O. D., Cavenee, W. K., Burger, P. C., Jouvett, A.,  
24 Scheithauer, B. W., and Kleihues, P. (2007). The 2007 WHO classification of tumours of  
25 the central nervous system. *Acta Neuropathol* 114, 97-109.
- 26 Louis, D. N., Perry, A., Reifenberger, G., von Deimling, A., Figarella-Branger, D.,  
27 Cavenee, W. K., Ohgaki, H., Wiestler, O. D., Kleihues, P., and Ellison, D. W. (2016). The  
28 2016 World Health Organization Classification of Tumors of the Central Nervous  
29 System: a summary. *Acta Neuropathol* 131, 803-820.
- 30 McNamara, M. G., Sahebjam, S., and Mason, W. P. (2013). Emerging biomarkers in  
31 glioblastoma. *Cancers (Basel)* 5, 1103-1119.
- 32 Miller, A. M., Shah, R. H., Pentsova, E. I., Pourmaleki, M., Briggs, S., Distefano, N.,  
33 Zheng, Y., Skakodub, A., Mehta, S. A., Campos, C., *et al.* (2019). Tracking tumour  
34 evolution in glioma through liquid biopsies of cerebrospinal fluid. *Nature* 565, 654-658.
- 35 Molinaro, A. M., Taylor, J. W., Wiencke, J. K., and Wrensch, M. R. (2019). Genetic and  
36 molecular epidemiology of adult diffuse glioma. *Nat Rev Neurol* 15, 405-417.

- 1 Mouliere, F., Mair, R., Chandrananda, D., Marass, F., Smith, C. G., Su, J., Morris, J.,  
2 Watts, C., Brindle, K. M., and Rosenfeld, N. (2018). Detection of cell-free DNA  
3 fragmentation and copy number alterations in cerebrospinal fluid from glioma patients.  
4 *EMBO Mol Med* 10.
- 5 Mur, P., Mollejo, M., Hernandez-Iglesias, T., de Lope, A. R., Castresana, J. S., Garcia, J.  
6 F., Fiano, C., Ribalta, T., Rey, J. A., and Melendez, B. (2015). Molecular classification  
7 defines 4 prognostically distinct glioma groups irrespective of diagnosis and grade. *J*  
8 *Neuropathol Exp Neurol* 74, 241-249.
- 9 Mur, P., Mollejo, M., Ruano, Y., de Lope, A. R., Fiano, C., Garcia, J. F., Castresana, J. S.,  
10 Hernandez-Lain, A., Rey, J. A., and Melendez, B. (2013). Codeletion of 1p and 19q  
11 determines distinct gene methylation and expression profiles in IDH-mutated  
12 oligodendroglial tumors. *Acta Neuropathol* 126, 277-289.
- 13 Park, J. Y., Lee, J. E., Park, J. B., Yoo, H., Lee, S. H., and Kim, J. H. (2014). Roles of  
14 Long Non-Coding RNAs on Tumorigenesis and Glioma Development. *Brain Tumor Res*  
15 *Treat* 2, 1-6.
- 16 Phillips, H. S., Kharbanda, S., Chen, R., Forrest, W. F., Soriano, R. H., Wu, T. D., Misra,  
17 A., Nigro, J. M., Colman, H., Soroceanu, L., *et al.* (2006). Molecular subclasses of high-  
18 grade glioma predict prognosis, delineate a pattern of disease progression, and resemble  
19 stages in neurogenesis. *Cancer Cell* 9, 157-173.
- 20 Puchalski, R. B., Shah, N., Miller, J., Dalley, R., Nomura, S. R., Yoon, J.-G., Smith,  
21 K. A., Lankovich, M., Bertagnoli, D., Bickley, K., *et al.* (2018). An anatomic  
22 transcriptional atlas of human glioblastoma. *Science* 360, 660-663.
- 23 Reed, J. E., Dunn, J. R., du Plessis, D. G., Shaw, E. J., Reeves, P., Gee, A. L., Warnke, P.  
24 C., Sellar, G. C., Moss, D. J., and Walker, C. (2007). Expression of cellular adhesion  
25 molecule 'OPCML' is down-regulated in gliomas and other brain tumours. *Neuropathol*  
26 *Appl Neurobiol* 33, 77-85.
- 27 Reina-Campos, M., Diaz-Meco, M. T., and Moscat, J. (2019). The Dual Roles of the  
28 Atypical Protein Kinase Cs in Cancer. *Cancer Cell* 36, 218-235.
- 29 Rivera, A. L., Pelloski, C. E., Gilbert, M. R., Colman, H., De La Cruz, C., Sulman, E. P.,  
30 Bekele, B. N., and Aldape, K. D. (2010). MGMT promoter methylation is predictive of  
31 response to radiotherapy and prognostic in the absence of adjuvant alkylating  
32 chemotherapy for glioblastoma. *Neuro Oncol* 12, 116-121.
- 33 Saito, N., and Shirai, Y. (2002). Protein kinase C gamma (PKC gamma): function of  
34 neuron specific isotype. *J Biochem* 132, 683-687.
- 35 Sasayama, D., Hattori, K., Ogawa, S., Yokota, Y., Matsumura, R., Teraishi, T., Hori, H.,  
36 Ota, M., Yoshida, S., and Kunugi, H. (2017). Genome-wide quantitative trait loci  
37 mapping of the human cerebrospinal fluid proteome. *Hum Mol Genet* 26, 44-51.

- 1 Schwartzbaum, J. A., Fisher, J. L., Aldape, K. D., and Wrensch, M. (2006). Epidemiology  
2 and molecular pathology of glioma. *Nat Clin Pract Neurol* 2, 494-503; quiz 491 p  
3 following 516.
- 4 Shao, Y., Chen, C., Shen, H., He, B. Z., Yu, D., Jiang, S., Zhao, S., Gao, Z., Zhu, Z.,  
5 Chen, X., *et al.* (2019). GenTree, an integrated resource for analyzing the evolution and  
6 function of primate-specific coding genes. *Genome Res* 29, 682-696.
- 7 Stewart, L. A. (2002). Chemotherapy in adult high-grade glioma: a systematic review and  
8 meta-analysis of individual patient data from 12 randomised trials. *Lancet* 359, 1011-  
9 1018.
- 10 Stupp, R., Mason, W. P., van den Bent, M. J., Weller, M., Fisher, B., Taphoorn, M. J. B.,  
11 Belanger, K., Brandes, A. A., Marosi, C., Bogdahn, U., *et al.* (2005). Radiotherapy plus  
12 Concomitant and Adjuvant Temozolomide for Glioblastoma. *New England Journal of*  
13 *Medicine* 352, 987-996.
- 14 Sturm, D., Witt, H., Hovestadt, V., Khuong-Quang, D. A., Jones, D. T., Konermann, C.,  
15 Pfaff, E., Tonjes, M., Sill, M., Bender, S., *et al.* (2012). Hotspot mutations in H3F3A and  
16 IDH1 define distinct epigenetic and biological subgroups of glioblastoma. *Cancer Cell*  
17 22, 425-437.
- 18 Sun, L., Hui, A. M., Su, Q., Vortmeyer, A., Kotliarov, Y., Pastorino, S., Passaniti, A.,  
19 Menon, J., Walling, J., Bailey, R., *et al.* (2006). Neuronal and glioma-derived stem cell  
20 factor induces angiogenesis within the brain. *Cancer Cell* 9, 287-300.
- 21 Sun, Y., Zhang, W., Chen, D., Lv, Y., Zheng, J., Lilljebjorn, H., Ran, L., Bao, Z., Sonesson,  
22 C., Sjogren, H. O., *et al.* (2014). A glioma classification scheme based on coexpression  
23 modules of EGFR and PDGFRA. *Proc Natl Acad Sci U S A* 111, 3538-3543.
- 24 Sydney C. Gary, C. A. Z., Veronica L. Chiang, Janette U. Gaw, Grace Gray, Susan  
25 Hockfield (2000). cDNA cloning, chromosomal localization, and expression analysis of  
26 human BEHAB/brevican, a brain specific proteoglycan regulated during cortical  
27 development and in glioma. *GENE* 256, 139-147.
- 28 Turcan, S., Rohle, D., Goenka, A., Walsh, L. A., Fang, F., Yilmaz, E., Campos, C., Fabius,  
29 A. W., Lu, C., Ward, P. S., *et al.* (2012). IDH1 mutation is sufficient to establish the  
30 glioma hypermethylator phenotype. *Nature* 483, 479-483.
- 31 van Bodegraven, E. J., van Asperen, J. V., Robe, P. A. J., and Hol, E. M. (2019).  
32 Importance of GFAP isoform-specific analyses in astrocytoma. *Glia* 67, 1417-1433.
- 33 van den Bent, M. J., Brandes, A. A., Taphoorn, M. J., Kros, J. M., Kouwenhoven, M. C.,  
34 Delattre, J. Y., Bernsen, H. J., Frenay, M., Tijssen, C. C., Grisold, W., *et al.* (2013).  
35 Adjuvant procarbazine, lomustine, and vincristine chemotherapy in newly diagnosed  
36 anaplastic oligodendroglioma: long-term follow-up of EORTC brain tumor group study  
37 26951. *J Clin Oncol* 31, 344-350.

- 1 van den Bent, M. J., Gao, Y., Kerkhof, M., Kros, J. M., Gorlia, T., van Zwieten, K.,  
2 Prince, J., van Duinen, S., Sillevs Smitt, P. A., Taphoorn, M., and French, P. J. (2015).  
3 Changes in the EGFR amplification and EGFRvIII expression between paired primary  
4 and recurrent glioblastomas. *Neuro Oncol* 17, 935-941.
- 5 Verhaak, R. G., Hoadley, K. A., Purdom, E., Wang, V., Qi, Y., Wilkerson, M. D., Miller,  
6 C. R., Ding, L., Golub, T., Mesirov, J. P., *et al.* (2010). Integrated genomic analysis  
7 identifies clinically relevant subtypes of glioblastoma characterized by abnormalities in  
8 PDGFRA, IDH1, EGFR, and NF1. *Cancer Cell* 17, 98-110.
- 9 Waitkus, M. S., Diplas, B. H., and Yan, H. (2018). Biological Role and Therapeutic  
10 Potential of IDH Mutations in Cancer. *Cancer Cell* 34, 186-195.
- 11 Wang, Q., Zhang, J., Liu, Y., Zhang, W., Zhou, J., Duan, R., Pu, P., Kang, C., and Han, L.  
12 (2016). A novel cell cycle-associated lncRNA, HOXA11-AS, is transcribed from the 5-  
13 prime end of the HOXA transcript and is a biomarker of progression in glioma. *Cancer*  
14 *Lett* 373, 251-259.
- 15 Wesseling, P., Kros, J. M., and Jeuken, J. W. M. (2011). The pathological diagnosis of  
16 diffuse gliomas: towards a smart synthesis of microscopic and molecular information in a  
17 multidisciplinary context. *Diagnostic Histopathology* 17, 486-494.
- 18 Wesseling, P., van den Bent, M., and Perry, A. (2015). Oligodendroglioma: pathology,  
19 molecular mechanisms and markers. *Acta Neuropathol* 129, 809-827.
- 20 Wick, W., Weller, M., van den Bent, M., Sanson, M., Weiler, M., von Deimling, A., Plass,  
21 C., Hegi, M., Platten, M., and Reifenberger, G. (2014). MGMT testing--the challenges for  
22 biomarker-based glioma treatment. *Nat Rev Neurol* 10, 372-385.
- 23 Wiestler, B., Capper, D., Holland-Letz, T., Korshunov, A., von Deimling, A., Pfister, S.  
24 M., Platten, M., Weller, M., and Wick, W. (2013). ATRX loss refines the classification of  
25 anaplastic gliomas and identifies a subgroup of IDH mutant astrocytic tumors with better  
26 prognosis. *Acta Neuropathol* 126, 443-451.
- 27 Yabe, I., Sasaki, H., Chen, D. H., Raskind, W. H., Bird, T. D., Yamashita, I., Tsuji, S.,  
28 Kikuchi, S., and Tashiro, K. (2003). Spinocerebellar ataxia type 14 caused by a mutation  
29 in protein kinase C gamma. *Arch Neurol* 60, 1749-1751.
- 30 Yan, W., Zhang, W., You, G., Zhang, J., Han, L., Bao, Z., Wang, Y., Liu, Y., Jiang, C.,  
31 Kang, C., *et al.* (2012). Molecular classification of gliomas based on whole genome gene  
32 expression: a systematic report of 225 samples from the Chinese Glioma Cooperative  
33 Group. *Neuro Oncol* 14, 1432-1440.
- 34 Yanai, I., Benjamin, H., Shmoish, M., Chalifa-Caspi, V., Shklar, M., Ophir, R., Bar-Even,  
35 A., Horn-Saban, S., Safran, M., Domany, E., *et al.* (2005). Genome-wide midrange  
36 transcription profiles reveal expression level relationships in human tissue specification.  
37 *Bioinformatics* 21, 650-659.

1 Zhang, S., Zhao, B. S., Zhou, A., Lin, K., Zheng, S., Lu, Z., Chen, Y., Sulman, E. P., Xie,  
2 K., Bogler, O., *et al.* (2017). m(6)A Demethylase ALKBH5 Maintains Tumorigenicity of  
3 Glioblastoma Stem-like Cells by Sustaining FOXM1 Expression and Cell Proliferation  
4 Program. *Cancer Cell* 31, 591-606 e596.

5 Zhang, W., Yan, W., You, G., Bao, Z., Wang, Y., Liu, Y., You, Y., and Jiang, T. (2013).  
6 Genome-wide DNA methylation profiling identifies ALDH1A3 promoter methylation as  
7 a prognostic predictor in G-CIMP- primary glioblastoma. *Cancer Lett* 328, 120-125.

8 Zhao, Z., Zhang, K., Wang, Z., Wang, K., Liu, X., Wu, F., and Chen, J. (2019). A  
9 comprehensive review of available omics data resources and molecular profiling for  
10 precision glioma studies. *Biomed Rep* 10, 3-9.

11
